# Supplementary material
Source: Royal Society of Chemistry journal article supplement (doi:10.1039/d5fo02160j)
Supplement: d5fo02160j1.pdf [file d5fo02160j1.pdf]

### SUPPLEMENTARY MATERIAL

Table S1. Information on the GWAS data used in the present mendelian randomized analysis

Table S2. Results of heterogeneity test and inverse-variance-weighted model used in mendelian randomization analysis for 17 dietary habits as exposure and Parkinson's disease as outcome.

Table S3. The associations of 17 dietary habits with the risk of Parkinson's disease using the inverse-variance weighted method.

Table S4. Results of heterogeneity test and inverse-variance-weighted model used in mendelian randomization analysis for 452 human blood metabolites as exposures and Parkinson's disease as outcome.

Table S5. The associations of 452 human blood metabolites with the risk of Parkinson's disease using the inverse-variance weighted mendelian randomization analysis.

Table S6. Sensitivity analysis for the association of significant dietary habits with the risk of Parkinson's disease via the Maximum likelihood, MR-RAPS, Penalized IVW, and MR-Egger approaches.

Table S7. Sensitivity analysis for the association of significant human blood metabolites with the risk of Parkinson's disease via the Maximum likelihood, MR-RAPS, Penalized IVW, and MR-Egger approaches.

Table S8. The associations of processed alcohol intake frequency as exposure and 19 human blood metabolites as outcome using the inverse-variance weighted method.

Table S9. The associations of processed dried fruit intake as exposure and 19 human blood metabolites as outcome using the inverse-variance weighted method.

Table S10. The associations of processed cereal intake as exposure and 19 human blood metabolites as outcome using the inverse-variance weighted method.

**Table S1. Information on the GWAS data used in the present mendelian randomized analysis**

| <b>Data Source</b>                | <b>Population</b> | <b>Phenotype</b>            | <b>Sample Size</b> | <b>No. of Cases</b> | <b>No. of Controls</b> |
|-----------------------------------|-------------------|-----------------------------|--------------------|---------------------|------------------------|
| <b>Exposure</b>                   |                   |                             |                    |                     |                        |
| <b>Shin et al. (2014)</b>         | European          | 452 human blood metabolites | 7,822              | N.A.                | N.A.                   |
| <b>Ben Elsworth et al. (2018)</b> |                   | Alcohol intake frequency    | 462,346            | N.A.                | N.A.                   |
|                                   |                   | Processed meat intake       | 461,981            | N.A.                | N.A.                   |
|                                   |                   | Poultry intake              | 461,900            | N.A.                | N.A.                   |
|                                   |                   | Beef intake                 | 461,053            | N.A.                | N.A.                   |
|                                   |                   | Non-oily fish intake        | 460,880            | N.A.                | N.A.                   |
|                                   |                   | Oily fish intake            | 460,443            | N.A.                | N.A.                   |
|                                   |                   | Pork intake                 | 460,162            | N.A.                | N.A.                   |
|                                   |                   | Lamb/mutton intake          | 460,006            | N.A.                | N.A.                   |
|                                   | European          | Bread intake                | 452,236            | N.A.                | N.A.                   |
|                                   |                   | Cheese intake               | 451,486            | N.A.                | N.A.                   |
|                                   |                   | Cooked vegetable intake     | 448,651            | N.A.                | N.A.                   |
|                                   |                   | Tea intake                  | 447,485            | N.A.                | N.A.                   |
|                                   |                   | Fresh fruit intake          | 446,462            | N.A.                | N.A.                   |
|                                   |                   | Cereal intake               | 441,640            | N.A.                | N.A.                   |
|                                   |                   | Salad/raw vegetable intake  | 435,435            | N.A.                | N.A.                   |
|                                   |                   | Coffee intake               | 428,860            | N.A.                | N.A.                   |
|                                   |                   | Dried fruit intake          | 421,764            | N.A.                | N.A.                   |
| <b>Outcome</b>                    |                   |                             |                    |                     |                        |
| <b>Nalls MA et al. (2019)</b>     | European          | Parkinson's disease         | 482,730            | 33,674              | 449,056                |

Abbreviation: GWAS, Genome-Wide Association Studies

**Table S2. Results of heterogeneity test and inverse-variance-weighted model used in mendelian randomization analysis for 17 dietary habits as exposure and Parkinson's disease as outcome.**

| <b>ID</b>   | <b>Exposure</b>              | <b>Outcome</b>      | <b>Q value</b> | <b>P value</b> | <b>Model</b>                  |
|-------------|------------------------------|---------------------|----------------|----------------|-------------------------------|
| ukb-b-5779  | Alcohol intake frequency     | Parkinson's disease | 563.810        | 1.25E-18       | multiplicative random effects |
| ukb-b-6324  | Processed meat intake        | Parkinson's disease | 211.714        | 0.014          | multiplicative random effects |
| ukb-b-8006  | Poultry intake               | Parkinson's disease | 206.865        | 5.86E-09       | multiplicative random effects |
| ukb-b-2862  | Beef intake                  | Parkinson's disease | 162.651        | 0.179          | fixed effects                 |
| ukb-b-17627 | Non-oily fish intake         | Parkinson's disease | 127.016        | 0.030          | multiplicative random effects |
| ukb-b-2209  | Oily fish intake             | Parkinson's disease | 334.491        | 1.7E-08        | multiplicative random effects |
| ukb-b-5640  | Pork intake                  | Parkinson's disease | 113.392        | 0.318          | fixed effects                 |
| ukb-b-14179 | Lamb/mutton intake           | Parkinson's disease | 283.747        | 6.01E-09       | multiplicative random effects |
| ukb-b-11348 | Bread intake                 | Parkinson's disease | 249.434        | 7.65E-06       | multiplicative random effects |
| ukb-b-1489  | Cheese intake                | Parkinson's disease | 345.441        | 4.96E-05       | multiplicative random effects |
| ukb-b-8089  | Cooked vegetable intake      | Parkinson's disease | 139.024        | 0.202          | fixed effects                 |
| ukb-b-6066  | Tea intake                   | Parkinson's disease | 247.894        | 0.001          | multiplicative random effects |
| ukb-b-3881  | Fresh fruit intake           | Parkinson's disease | 206.662        | 0.077          | fixed effects                 |
| ukb-b-15926 | Cereal intake                | Parkinson's disease | 278.700        | 0.001          | multiplicative random effects |
| ukb-b-1996  | Salad / raw vegetable intake | Parkinson's disease | 200.726        | 0.001          | multiplicative random effects |
| ukb-b-5237  | Coffee intake                | Parkinson's disease | 170.847        | 0.078          | fixed effects                 |
| ukb-b-16576 | Dried fruit intake           | Parkinson's disease | 318.210        | 2.71E-08       | multiplicative random effects |

**Table S3. The associations of 17 dietary habits with the risk of Parkinson's disease using the inverse-variance weighted method.**

| ID          | Exposure                     | nSNP | IVW              |         |
|-------------|------------------------------|------|------------------|---------|
|             |                              |      | OR (95% CI)      | P value |
| ukb-b-5779  | Alcohol intake frequency     | 299  | 0.77 (0.65-0.92) | 0.004   |
| ukb-b-6324  | Processed meat intake        | 170  | 0.80 (0.57-1.12) | 0.197   |
| ukb-b-8006  | Poultry intake               | 104  | 0.99 (0.52-1.86) | 0.965   |
| ukb-b-2862  | Beef intake                  | 148  | 0.92 (0.62-1.36) | 0.675   |
| ukb-b-17627 | Non-oily fish intake         | 100  | 0.71 (0.40-1.26) | 0.246   |
| ukb-b-2209  | Oily fish intake             | 204  | 1.40 (0.99-1.96) | 0.054   |
| ukb-b-5640  | Pork intake                  | 108  | 1.53 (0.90-2.59) | 0.117   |
| ukb-b-14179 | Lamb/mutton intake           | 161  | 1.52 (0.87-2.64) | 0.139   |
| ukb-b-11348 | Bread intake                 | 161  | 0.71 (0.48-1.04) | 0.080   |
| ukb-b-1489  | Cheese intake                | 250  | 1.22 (0.94-1.57) | 0.129   |
| ukb-b-8089  | Cooked vegetable intake      | 127  | 0.90 (0.57-1.44) | 0.672   |
| ukb-b-6066  | Tea intake                   | 182  | 1.06 (0.80-1.40) | 0.697   |
| ukb-b-3881  | Fresh fruit intake           | 180  | 0.91 (0.59-1.41) | 0.678   |
| ukb-b-15926 | Cereal intake                | 207  | 1.46 (1.03-2.06) | 0.033   |
| ukb-b-1996  | Salad / raw vegetable intake | 141  | 1.30 (0.73-2.33) | 0.375   |
| ukb-b-5237  | Coffee intake                | 147  | 1.21 (0.88-1.66) | 0.250   |
| ukb-b-16576 | Dried fruit intake           | 193  | 1.70 (1.13-2.56) | 0.012   |

Abbreviations: SNP, single-nucleotide polymorphism; IVW, inverse-variance weighted; OR, odds ratio; 95% CI, 95% confidence interval.

**Table S4. Results of heterogeneity test and inverse-variance-weighted model used in mendelian randomization analysis for 452 human blood metabolites as exposures and Parkinson's disease as outcome.**

| <b>ID</b> | <b>Metabolites</b>       | <b>Outcome</b>      | <b>Q value</b> | <b>P value</b> | <b>Model</b>                  |
|-----------|--------------------------|---------------------|----------------|----------------|-------------------------------|
| met-a-303 | Glutamine                | Parkinson's disease | 27.622         | 2.57E-04       | multiplicative random effects |
| met-a-304 | Tryptophan               | Parkinson's disease | 172.098        | 0.077          | fixed effects                 |
| met-a-305 | Histidine                | Parkinson's disease | 10.308         | 0.112          | fixed effects                 |
| met-a-306 | Leucine                  | Parkinson's disease | 170.190        | 0.223          | fixed effects                 |
| met-a-307 | Cholesterol              | Parkinson's disease | 39.432         | 0.627          | fixed effects                 |
| met-a-308 | Phenylalanine            | Parkinson's disease | 2.678          | 0.613          | fixed effects                 |
| met-a-309 | Creatinine               | Parkinson's disease | 23.412         | 0.437          | fixed effects                 |
| met-a-310 | Lactate                  | Parkinson's disease | 27.786         | 0.003          | multiplicative random effects |
| met-a-311 | 3-hydroxybutyrate (BHBA) | Parkinson's disease | 2.554          | 0.979          | fixed effects                 |
| met-a-312 | Arabinose                | Parkinson's disease | 3.586          | 0.610          | fixed effects                 |
| met-a-313 | Fructose                 | Parkinson's disease | 0.302          | 0.860          | fixed effects                 |
| met-a-314 | Mannose                  | Parkinson's disease | 31.143         | 0.019          | multiplicative random effects |
| met-a-315 | Pyruvate                 | Parkinson's disease | 12.608         | 0.558          | fixed effects                 |
| met-a-316 | Uridine                  | Parkinson's disease | 17.200         | 0.576          | fixed effects                 |
| met-a-317 | Linoleate (18:2n6)       | Parkinson's disease | 13.686         | 0.549          | fixed effects                 |
| met-a-318 | Allantoin                | Parkinson's disease | 12.182         | 0.878          | fixed effects                 |
| met-a-319 | Arachidonate (20:4n6)    | Parkinson's disease | 27.752         | 0.115          | fixed effects                 |
| met-a-320 | Deoxycholate             | Parkinson's disease | 13.679         | 0.623          | fixed effects                 |
| met-a-321 | Margarate (17:0)         | Parkinson's disease | 3.499          | 0.744          | fixed effects                 |
| met-a-322 | Inosine                  | Parkinson's disease | 10.425         | 0.317          | fixed effects                 |
| met-a-323 | Isoleucine               | Parkinson's disease | 25.970         | 0.075          | fixed effects                 |
| met-a-324 | Threonine                | Parkinson's disease | 38.234         | 0.002          | multiplicative random effects |
| met-a-325 | Tyrosine                 | Parkinson's         | 37.420         | 0.165          | fixed effects                 |

|           |                       |                     |        |       |                               |
|-----------|-----------------------|---------------------|--------|-------|-------------------------------|
|           |                       | disease             |        |       |                               |
| met-a-326 | Lysine                | Parkinson's disease | 14.958 | 0.825 | fixed effects                 |
| met-a-327 | Methionine            | Parkinson's disease | 26.114 | 0.127 | fixed effects                 |
| met-a-328 | Malate                | Parkinson's disease | 14.336 | 0.643 | fixed effects                 |
| met-a-329 | Palmitate (16:0)      | Parkinson's disease | 23.645 | 0.596 | fixed effects                 |
| met-a-330 | Nonadecanoate (19:0)  | Parkinson's disease | 21.160 | 0.098 | fixed effects                 |
| met-a-331 | Stearate (18:0)       | Parkinson's disease | 41.072 | 0.467 | fixed effects                 |
| met-a-332 | Oleate (18:1n9)       | Parkinson's disease | 20.651 | 0.356 | fixed effects                 |
| met-a-333 | Pentadecanoate (15:0) | Parkinson's disease | 27.727 | 0.089 | fixed effects                 |
| met-a-334 | Myristate (14:0)      | Parkinson's disease | 17.473 | 0.682 | fixed effects                 |
| met-a-335 | Pipecolate            | Parkinson's disease | 22.162 | 0.053 | fixed effects                 |
| met-a-336 | Ornithine             | Parkinson's disease | 13.716 | 0.056 | fixed effects                 |
| met-a-337 | 5-oxoproline          | Parkinson's disease | 21.645 | 0.420 | fixed effects                 |
| met-a-338 | Pantothenate          | Parkinson's disease | 28.662 | 0.233 | fixed effects                 |
| met-a-339 | 4-acetamidobutanoate  | Parkinson's disease | 33.316 | 0.403 | fixed effects                 |
| met-a-340 | Alpha-tocopherol      | Parkinson's disease | 10.336 | 0.412 | fixed effects                 |
| met-a-341 | Citrate               | Parkinson's disease | 71.530 | 0.002 | multiplicative random effects |
| met-a-342 | Glycerate             | Parkinson's disease | 11.803 | 0.757 | fixed effects                 |
| met-a-343 | Guanosine             | Parkinson's disease | 6.411  | 0.894 | fixed effects                 |
| met-a-344 | N-acetylalanine       | Parkinson's disease | 18.595 | 0.548 | fixed effects                 |
| met-a-345 | Urate                 | Parkinson's disease | 22.290 | 0.219 | fixed effects                 |
| met-a-346 | Ursodeoxycholate      | Parkinson's disease | 4.700  | 0.910 | fixed effects                 |
| met-a-347 | Arginine              | Parkinson's disease | 10.305 | 0.962 | fixed effects                 |
| met-a-348 | Ascorbate (Vitamin C) | Parkinson's disease | 12.658 | 0.475 | fixed effects                 |
| met-a-349 | Heptanoate (7:0)      | Parkinson's disease | 32.086 | 0.512 | fixed effects                 |

|           |                         |                     |        |          |                               |
|-----------|-------------------------|---------------------|--------|----------|-------------------------------|
| met-a-350 | Laurate (12:0)          | Parkinson's disease | 33.164 | 0.692    | fixed effects                 |
| met-a-351 | Valine                  | Parkinson's disease | 6.457  | 0.264    | fixed effects                 |
| met-a-352 | Urea                    | Parkinson's disease | 7.759  | 0.902    | fixed effects                 |
| met-a-353 | Cortisol                | Parkinson's disease | 8.104  | 0.777    | fixed effects                 |
| met-a-354 | Cortisone               | Parkinson's disease | 37.556 | 0.194    | fixed effects                 |
| met-a-355 | Proline                 | Parkinson's disease | 40.035 | 0.186    | fixed effects                 |
| met-a-356 | Citrulline              | Parkinson's disease | 41.228 | 0.417    | fixed effects                 |
| met-a-357 | Biliverdin              | Parkinson's disease | 12.798 | 0.542    | fixed effects                 |
| met-a-358 | Serotonin (5HT)         | Parkinson's disease | 15.029 | 0.376    | fixed effects                 |
| met-a-359 | Gamma-glutamylglutamine | Parkinson's disease | 32.186 | 0.041    | multiplicative random effects |
| met-a-360 | Gamma-glutamyltyrosine  | Parkinson's disease | 41.017 | 0.558    | fixed effects                 |
| met-a-361 | Hypoxanthine            | Parkinson's disease | 15.118 | 0.817    | fixed effects                 |
| met-a-362 | Betaine                 | Parkinson's disease | 26.077 | 0.204    | fixed effects                 |
| met-a-363 | Xanthine                | Parkinson's disease | 0.848  | 0.654    | fixed effects                 |
| met-a-364 | Phosphate               | Parkinson's disease | 0.640  | 0.959    | fixed effects                 |
| met-a-365 | 3-methoxytyrosine       | Parkinson's disease | 28.936 | 0.016    | multiplicative random effects |
| met-a-366 | Pelargonate (9:0)       | Parkinson's disease | 38.441 | 0.201    | fixed effects                 |
| met-a-367 | Undecanoate (11:0)      | Parkinson's disease | 43.250 | 0.018    | multiplicative random effects |
| met-a-368 | Beta-hydroxyisovalerate | Parkinson's disease | 50.169 | 5.56E-04 | multiplicative random effects |
| met-a-369 | Taurodeoxycholate       | Parkinson's disease | 12.606 | 0.398    | fixed effects                 |
| met-a-370 | X-02973                 | Parkinson's disease | 20.483 | 0.613    | fixed effects                 |
| met-a-371 | X-03003                 | Parkinson's disease | 10.097 | 0.183    | fixed effects                 |
| met-a-372 | X-03088                 | Parkinson's disease | 23.530 | 0.171    | fixed effects                 |
| met-a-373 | X-03094                 | Parkinson's disease | 55.299 | 0.002    | multiplicative random effects |
| met-a-374 | Glycerol                | Parkinson's         | 23.543 | 0.132    | fixed effects                 |

|           |                                     |                     |         |          |                               |
|-----------|-------------------------------------|---------------------|---------|----------|-------------------------------|
|           |                                     | disease             |         |          |                               |
| met-a-375 | Kynurenine                          | Parkinson's disease | 48.577  | 0.050    | fixed effects                 |
| met-a-376 | Mannitol                            | Parkinson's disease | 16.770  | 0.080    | fixed effects                 |
| met-a-377 | Glycerol 3-phosphate (G3P)          | Parkinson's disease | 27.077  | 0.012    | multiplicative random effects |
| met-a-378 | Acetylphosphate                     | Parkinson's disease | 26.995  | 0.058    | fixed effects                 |
| met-a-379 | Carnitine                           | Parkinson's disease | 205.864 | 0.013    | multiplicative random effects |
| met-a-380 | Choline                             | Parkinson's disease | 29.815  | 0.123    | fixed effects                 |
| met-a-381 | N-acetylmethionine                  | Parkinson's disease | 14.160  | 0.363    | fixed effects                 |
| met-a-382 | N1-methyladenosine                  | Parkinson's disease | 6.030   | 0.536    | fixed effects                 |
| met-a-383 | 3-methyl-2-oxovalerate              | Parkinson's disease | 62.660  | 6.48E-04 | multiplicative random effects |
| met-a-384 | 3-methylhistidine                   | Parkinson's disease | 7.908   | 0.442    | fixed effects                 |
| met-a-385 | 3-phenylpropionate (hydrocinnamate) | Parkinson's disease | 14.247  | 0.285    | fixed effects                 |
| met-a-386 | Phenylacetate                       | Parkinson's disease | 14.946  | 0.037    | multiplicative random effects |
| met-a-387 | Glycerophosphorylcholine (GPC)      | Parkinson's disease | 15.107  | 0.588    | fixed effects                 |
| met-a-388 | Aspartate                           | Parkinson's disease | 1.107   | 0.775    | fixed effects                 |
| met-a-389 | X-04357                             | Parkinson's disease | 5.535   | 0.785    | fixed effects                 |
| met-a-390 | X-04494                             | Parkinson's disease | 6.019   | 0.945    | fixed effects                 |
| met-a-391 | X-04495                             | Parkinson's disease | 8.366   | 0.593    | fixed effects                 |
| met-a-392 | X-04498                             | Parkinson's disease | 16.230  | 0.702    | fixed effects                 |
| met-a-393 | X-04499--3,4-dihydroxybutyrate      | Parkinson's disease | 22.686  | 0.420    | fixed effects                 |
| met-a-394 | X-04500                             | Parkinson's disease | 11.970  | 0.287    | fixed effects                 |
| met-a-395 | Dihomo-linoleate (20:2n6)           | Parkinson's disease | 3.000   | 0.885    | fixed effects                 |
| met-a-396 | X-18601                             | Parkinson's disease | 17.611  | 0.613    | fixed effects                 |
| met-a-397 | 2-hydroxystearate                   | Parkinson's disease | 35.313  | 0.359    | fixed effects                 |
| met-a-398 | X-05426                             | Parkinson's disease | 22.180  | 0.008    | multiplicative random effects |

|           |                                  |                     |        |          |                               |
|-----------|----------------------------------|---------------------|--------|----------|-------------------------------|
| met-a-399 | Indolelactate                    | Parkinson's disease | 15.982 | 0.454    | fixed effects                 |
| met-a-400 | Glycylvaline                     | Parkinson's disease | 12.221 | 0.057    | fixed effects                 |
| met-a-401 | Gamma-glutamylleucine            | Parkinson's disease | 63.011 | 3.92E-04 | multiplicative random effects |
| met-a-402 | Eicosapentaenoate (EPA; 20:5n3)  | Parkinson's disease | 10.156 | 0.516    | fixed effects                 |
| met-a-403 | Estrone 3-sulfate                | Parkinson's disease | 15.697 | 0.153    | fixed effects                 |
| met-a-404 | Glycocholate                     | Parkinson's disease | 5.284  | 0.727    | fixed effects                 |
| met-a-405 | Glycodeoxycholate                | Parkinson's disease | 8.756  | 0.188    | fixed effects                 |
| met-a-406 | Taurochenodeoxycholate           | Parkinson's disease | 19.705 | 0.073    | fixed effects                 |
| met-a-407 | Taurocholate                     | Parkinson's disease | 18.097 | 0.258    | fixed effects                 |
| met-a-408 | X-05907                          | Parkinson's disease | 16.412 | 0.127    | fixed effects                 |
| met-a-409 | Docosahexaenoate (DHA; 22:6n3)   | Parkinson's disease | 19.263 | 0.002    | multiplicative random effects |
| met-a-410 | 1-stearoylglycerophosphoinositol | Parkinson's disease | 5.146  | 0.525    | fixed effects                 |
| met-a-411 | X-06226                          | Parkinson's disease | 27.498 | 0.193    | fixed effects                 |
| met-a-412 | X-06246                          | Parkinson's disease | 28.732 | 0.070    | fixed effects                 |
| met-a-413 | X-06267                          | Parkinson's disease | 8.354  | 0.681    | fixed effects                 |
| met-a-414 | X-06307                          | Parkinson's disease | 7.937  | 0.338    | fixed effects                 |
| met-a-415 | X-06350                          | Parkinson's disease | 9.938  | 0.699    | fixed effects                 |
| met-a-416 | X-06351                          | Parkinson's disease | 7.457  | 0.114    | fixed effects                 |
| met-a-417 | Myo-inositol                     | Parkinson's disease | 42.882 | 0.200    | fixed effects                 |
| met-a-418 | Glucose                          | Parkinson's disease | 49.835 | 0.077    | fixed effects                 |
| met-a-419 | 1,5-anhydroglucitol (1,5-AG)     | Parkinson's disease | 45.839 | 0.013    | multiplicative random effects |
| met-a-420 | 2-hydroxybutyrate (AHB)          | Parkinson's disease | 25.191 | 0.033    | multiplicative random effects |
| met-a-421 | 3-methyl-2-oxobutyrate           | Parkinson's disease | 8.214  | 0.942    | fixed effects                 |
| met-a-422 | 1,6-anhydroglucose               | Parkinson's disease | 16.326 | 0.294    | fixed effects                 |

|           |                                      |                     |        |       |                               |
|-----------|--------------------------------------|---------------------|--------|-------|-------------------------------|
| met-a-423 | 1-palmitoylglycerol (1-monopalmitin) | Parkinson's disease | 24.989 | 0.023 | multiplicative random effects |
| met-a-424 | 1-oleoylglycerol (1-monoolein)       | Parkinson's disease | 16.239 | 0.299 | fixed effects                 |
| met-a-425 | 1-stearoylglycerol (1-monostearin)   | Parkinson's disease | 34.538 | 0.058 | fixed effects                 |
| met-a-426 | X-08402                              | Parkinson's disease | 19.788 | 0.471 | fixed effects                 |
| met-a-427 | 2-hydroxyisobutyrate                 | Parkinson's disease | 15.683 | 0.546 | fixed effects                 |
| met-a-428 | X-08766                              | Parkinson's disease | 21.755 | 0.084 | fixed effects                 |
| met-a-429 | 4-methyl-2-oxopentanoate             | Parkinson's disease | 15.697 | 0.266 | fixed effects                 |
| met-a-430 | Phenyllactate (PLA)                  | Parkinson's disease | 11.166 | 0.799 | fixed effects                 |
| met-a-431 | Homocitrulline                       | Parkinson's disease | 8.402  | 0.210 | fixed effects                 |
| met-a-432 | Aspartylphenylalanine                | Parkinson's disease | 0.716  | 0.949 | fixed effects                 |
| met-a-433 | Levulinate (4-oxovalerate)           | Parkinson's disease | 44.876 | 0.714 | fixed effects                 |
| met-a-434 | Palmitoylcarnitine                   | Parkinson's disease | 13.949 | 0.083 | fixed effects                 |
| met-a-435 | X-08988                              | Parkinson's disease | 52.625 | 0.007 | multiplicative random effects |
| met-a-436 | X-09026                              | Parkinson's disease | 14.645 | 0.403 | fixed effects                 |
| met-a-437 | X-09108                              | Parkinson's disease | 12.450 | 0.410 | fixed effects                 |
| met-a-438 | Cholate                              | Parkinson's disease | 6.982  | 0.431 | fixed effects                 |
| met-a-439 | X-09706                              | Parkinson's disease | 22.897 | 0.349 | fixed effects                 |
| met-a-440 | X-10395                              | Parkinson's disease | 33.505 | 0.218 | fixed effects                 |
| met-a-441 | X-10429                              | Parkinson's disease | 28.365 | 0.101 | fixed effects                 |
| met-a-442 | X-10500                              | Parkinson's disease | 31.059 | 0.514 | fixed effects                 |
| met-a-443 | X-10506                              | Parkinson's disease | 13.874 | 0.309 | fixed effects                 |
| met-a-444 | X-10510                              | Parkinson's disease | 14.880 | 0.829 | fixed effects                 |
| met-a-445 | 1-linoleoylglycerol (1-monolinolein) | Parkinson's disease | 10.507 | 0.724 | fixed effects                 |
| met-a-446 | Indoleacetate                        | Parkinson's disease | 14.669 | 0.685 | fixed effects                 |
| met-a-447 | Hyodeoxycholate                      | Parkinson's         | 25.788 | 0.040 | multiplicative random         |

|           |                                                      | disease             |        |       | effects                       |
|-----------|------------------------------------------------------|---------------------|--------|-------|-------------------------------|
| met-a-448 | 3-indoxyl sulfate                                    | Parkinson's disease | 5.256  | 0.262 | fixed effects                 |
| met-a-449 | N-acetylglycine                                      | Parkinson's disease | 4.222  | 0.979 | fixed effects                 |
| met-a-450 | Bilirubin (Z,Z)                                      | Parkinson's disease | 9.488  | 0.303 | fixed effects                 |
| met-a-451 | Creatine                                             | Parkinson's disease | 6.163  | 0.405 | fixed effects                 |
| met-a-452 | Erythrose                                            | Parkinson's disease | 6.869  | 0.443 | fixed effects                 |
| met-a-453 | Threonate                                            | Parkinson's disease | 18.795 | 0.223 | fixed effects                 |
| met-a-454 | X-10810                                              | Parkinson's disease | 19.304 | 0.200 | fixed effects                 |
| met-a-455 | Cysteine                                             | Parkinson's disease | 8.247  | 0.961 | fixed effects                 |
| met-a-456 | Pyroglutamylglycine                                  | Parkinson's disease | 2.299  | 0.513 | fixed effects                 |
| met-a-457 | N-(2-furoyl)glycine                                  | Parkinson's disease | 19.415 | 0.729 | fixed effects                 |
| met-a-458 | DSGEGDFXAEGGGVR*                                     | Parkinson's disease | 7.033  | 0.855 | fixed effects                 |
| met-a-459 | Pyridoxate                                           | Parkinson's disease | 11.999 | 0.285 | fixed effects                 |
| met-a-460 | Androsterone sulfate                                 | Parkinson's disease | 21.498 | 0.205 | fixed effects                 |
| met-a-461 | 3-carboxy-4-methyl-5-propyl-2-furanpropanoate (CMPF) | Parkinson's disease | 6.253  | 0.903 | fixed effects                 |
| met-a-462 | 3-(4-hydroxyphenyl)lactate                           | Parkinson's disease | 25.555 | 0.322 | fixed effects                 |
| met-a-463 | Acetylcarnitine                                      | Parkinson's disease | 30.766 | 0.014 | multiplicative random effects |
| met-a-464 | Serine                                               | Parkinson's disease | 27.080 | 0.567 | fixed effects                 |
| met-a-465 | Trans-4-hydroxyproline                               | Parkinson's disease | 12.238 | 0.032 | multiplicative random effects |
| met-a-466 | Glutamate                                            | Parkinson's disease | 1.712  | 0.425 | fixed effects                 |
| met-a-467 | Hexanoylcarnitine                                    | Parkinson's disease | 12.395 | 0.649 | fixed effects                 |
| met-a-468 | Glycine                                              | Parkinson's disease | 27.978 | 0.217 | fixed effects                 |
| met-a-469 | Alanine                                              | Parkinson's disease | 43.876 | 0.120 | fixed effects                 |
| met-a-470 | Glycochenodeoxycholate                               | Parkinson's disease | 26.919 | 0.013 | multiplicative random effects |
| met-a-471 | 2-aminobutyrate                                      | Parkinson's disease | 26.079 | 0.929 | fixed effects                 |

|           |                                         |                     |        |          |                               |
|-----------|-----------------------------------------|---------------------|--------|----------|-------------------------------|
| met-a-472 | Scyllo-inositol                         | Parkinson's disease | 7.160  | 0.786    | fixed effects                 |
| met-a-473 | Dodecanedioate                          | Parkinson's disease | 6.946  | 0.225    | fixed effects                 |
| met-a-474 | Gamma-glutamylvaline                    | Parkinson's disease | 13.447 | 0.337    | fixed effects                 |
| met-a-475 | Indolepropionate                        | Parkinson's disease | 11.452 | 0.720    | fixed effects                 |
| met-a-476 | Butyrylcarnitine                        | Parkinson's disease | 24.446 | 0.379    | fixed effects                 |
| met-a-477 | Myristoleate (14:1n5)                   | Parkinson's disease | 20.535 | 0.083    | fixed effects                 |
| met-a-478 | Dehydroisoandrosterone sulfate (DHEA-S) | Parkinson's disease | 20.372 | 0.373    | fixed effects                 |
| met-a-479 | Propionylcarnitine                      | Parkinson's disease | 27.663 | 0.482    | fixed effects                 |
| met-a-480 | Caproate (6:0)                          | Parkinson's disease | 50.994 | 0.018    | multiplicative random effects |
| met-a-481 | Caprylate (8:0)                         | Parkinson's disease | 28.091 | 0.922    | fixed effects                 |
| met-a-482 | 10-undecenoate (11:1n1)                 | Parkinson's disease | 45.369 | 0.005    | multiplicative random effects |
| met-a-483 | Docosapentaenoate (n3 DPA; 22:5n3)      | Parkinson's disease | 7.659  | 0.569    | fixed effects                 |
| met-a-484 | X-11204                                 | Parkinson's disease | 33.982 | 0.611    | fixed effects                 |
| met-a-485 | X-02269                                 | Parkinson's disease | 12.684 | 0.080    | fixed effects                 |
| met-a-486 | Phenol sulfate                          | Parkinson's disease | 25.515 | 0.008    | multiplicative random effects |
| met-a-487 | X-06126                                 | Parkinson's disease | 10.055 | 0.611    | fixed effects                 |
| met-a-488 | X-07765                                 | Parkinson's disease | 5.795  | 0.926    | fixed effects                 |
| met-a-489 | X-11247                                 | Parkinson's disease | 11.358 | 0.837    | fixed effects                 |
| met-a-490 | X-11261                                 | Parkinson's disease | 12.367 | 0.498    | fixed effects                 |
| met-a-491 | Bilirubin (E,E)*                        | Parkinson's disease | 10.065 | 0.185    | fixed effects                 |
| met-a-492 | X-02249                                 | Parkinson's disease | 9.975  | 0.443    | fixed effects                 |
| met-a-493 | Heme*                                   | Parkinson's disease | 18.451 | 0.103    | fixed effects                 |
| met-a-494 | X-11299                                 | Parkinson's disease | 15.421 | 0.117    | fixed effects                 |
| met-a-495 | X-11315                                 | Parkinson's disease | 59.713 | 1.15E-04 | multiplicative random effects |
| met-a-496 | X-11317                                 | Parkinson's         | 50.614 | 0.121    | fixed effects                 |

|           |                                                      |                     |        |          |                               |
|-----------|------------------------------------------------------|---------------------|--------|----------|-------------------------------|
|           |                                                      | disease             |        |          |                               |
| met-a-497 | 1-linoleoylglycerophosphoethanolamine*               | Parkinson's disease | 26.992 | 0.008    | multiplicative random effects |
| met-a-498 | X-11327                                              | Parkinson's disease | 47.244 | 0.024    | multiplicative random effects |
| met-a-499 | X-11334                                              | Parkinson's disease | 15.978 | 0.915    | fixed effects                 |
| met-a-500 | 3-dehydrocarnitine*                                  | Parkinson's disease | 23.591 | 0.313    | fixed effects                 |
| met-a-501 | Pyroglutamine*                                       | Parkinson's disease | 20.741 | 0.189    | fixed effects                 |
| met-a-502 | C-glycosyltryptophan*                                | Parkinson's disease | 34.315 | 0.034    | multiplicative random effects |
| met-a-503 | X-11374                                              | Parkinson's disease | 10.015 | 0.903    | fixed effects                 |
| met-a-504 | X-11381                                              | Parkinson's disease | 12.220 | 0.662    | fixed effects                 |
| met-a-505 | X-03056--N-[3-(2-Oxopyrrolidin-1-yl)propyl]acetamide | Parkinson's disease | 32.124 | 0.269    | fixed effects                 |
| met-a-506 | X-11412                                              | Parkinson's disease | 30.789 | 0.877    | fixed effects                 |
| met-a-507 | X-01911                                              | Parkinson's disease | 11.501 | 0.778    | fixed effects                 |
| met-a-508 | X-11422--xanthine                                    | Parkinson's disease | 8.375  | 0.212    | fixed effects                 |
| met-a-509 | X-11423--O-sulfo-L-tyrosine                          | Parkinson's disease | 87.221 | 2.33E-04 | multiplicative random effects |
| met-a-510 | X-09789                                              | Parkinson's disease | 7.136  | 0.713    | fixed effects                 |
| met-a-511 | X-11437                                              | Parkinson's disease | 17.278 | 0.242    | fixed effects                 |
| met-a-512 | X-11438                                              | Parkinson's disease | 43.432 | 0.006    | multiplicative random effects |
| met-a-513 | X-11440                                              | Parkinson's disease | 15.020 | 0.661    | fixed effects                 |
| met-a-514 | X-11441                                              | Parkinson's disease | 19.181 | 0.084    | fixed effects                 |
| met-a-515 | X-11442                                              | Parkinson's disease | 44.421 | 1.70E-04 | multiplicative random effects |
| met-a-516 | X-11444                                              | Parkinson's disease | 7.618  | 0.747    | fixed effects                 |
| met-a-517 | X-11445--5-alpha-pregnan-3beta,20alpha-disulfate     | Parkinson's disease | 12.809 | 0.617    | fixed effects                 |
| met-a-518 | X-11452                                              | Parkinson's disease | 3.563  | 0.614    | fixed effects                 |
| met-a-519 | X-11469                                              | Parkinson's disease | 24.534 | 0.078    | fixed effects                 |

|           |                              |                     |        |       |                               |
|-----------|------------------------------|---------------------|--------|-------|-------------------------------|
| met-a-520 | X-11470                      | Parkinson's disease | 16.007 | 0.067 | fixed effects                 |
| met-a-521 | X-11478                      | Parkinson's disease | 5.237  | 0.875 | fixed effects                 |
| met-a-522 | X-11483                      | Parkinson's disease | 4.985  | 0.892 | fixed effects                 |
| met-a-523 | X-11485                      | Parkinson's disease | 6.319  | 0.276 | fixed effects                 |
| met-a-524 | X-11491                      | Parkinson's disease | 11.807 | 0.461 | fixed effects                 |
| met-a-525 | X-11497                      | Parkinson's disease | 15.373 | 0.353 | fixed effects                 |
| met-a-526 | HWESASXX*                    | Parkinson's disease | 6.025  | 0.304 | fixed effects                 |
| met-a-527 | X-11521                      | Parkinson's disease | 14.049 | 0.121 | fixed effects                 |
| met-a-528 | X-11529                      | Parkinson's disease | 18.782 | 0.065 | fixed effects                 |
| met-a-529 | X-11530                      | Parkinson's disease | 4.200  | 0.964 | fixed effects                 |
| met-a-530 | X-11537                      | Parkinson's disease | 3.511  | 0.622 | fixed effects                 |
| met-a-531 | X-11538                      | Parkinson's disease | 13.310 | 0.424 | fixed effects                 |
| met-a-532 | X-11540                      | Parkinson's disease | 2.848  | 0.899 | fixed effects                 |
| met-a-533 | X-11546                      | Parkinson's disease | 30.901 | 0.006 | multiplicative random effects |
| met-a-534 | X-11550                      | Parkinson's disease | 14.144 | 0.823 | fixed effects                 |
| met-a-535 | X-11552                      | Parkinson's disease | 10.865 | 0.697 | fixed effects                 |
| met-a-536 | X-11593--O-methylascorbate*  | Parkinson's disease | 50.997 | 0.218 | fixed effects                 |
| met-a-537 | Adrenate (22:4n6)            | Parkinson's disease | 16.699 | 0.081 | fixed effects                 |
| met-a-538 | Homostachydrine*             | Parkinson's disease | 0.864  | 0.930 | fixed effects                 |
| met-a-539 | ADSGEGDFXAEGGGVR*            | Parkinson's disease | 13.663 | 0.189 | fixed effects                 |
| met-a-540 | X-11786--methylcysteine      | Parkinson's disease | 20.102 | 0.065 | fixed effects                 |
| met-a-541 | X-11787                      | Parkinson's disease | 26.032 | 0.299 | fixed effects                 |
| met-a-542 | X-11792                      | Parkinson's disease | 14.357 | 0.423 | fixed effects                 |
| met-a-543 | X-11793--oxidized bilirubin* | Parkinson's disease | 5.798  | 0.953 | fixed effects                 |
| met-a-544 | X-11795                      | Parkinson's         | 11.341 | 0.415 | fixed effects                 |

|           |                                      |                     |        |       |                               |
|-----------|--------------------------------------|---------------------|--------|-------|-------------------------------|
|           |                                      | disease             |        |       |                               |
| met-a-545 | X-11799                              | Parkinson's disease | 8.978  | 0.175 | fixed effects                 |
| met-a-546 | X-11805                              | Parkinson's disease | 8.517  | 0.385 | fixed effects                 |
| met-a-547 | X-11818                              | Parkinson's disease | 23.028 | 0.190 | fixed effects                 |
| met-a-548 | X-11820                              | Parkinson's disease | 16.006 | 0.191 | fixed effects                 |
| met-a-549 | X-11843                              | Parkinson's disease | 1.544  | 0.462 | fixed effects                 |
| met-a-550 | X-11845                              | Parkinson's disease | 20.538 | 0.303 | fixed effects                 |
| met-a-551 | X-11847                              | Parkinson's disease | 7.840  | 0.728 | fixed effects                 |
| met-a-552 | X-11849                              | Parkinson's disease | 15.136 | 0.234 | fixed effects                 |
| met-a-553 | X-11850                              | Parkinson's disease | 5.943  | 0.546 | fixed effects                 |
| met-a-554 | X-11852                              | Parkinson's disease | 23.067 | 0.003 | multiplicative random effects |
| met-a-555 | X-11858                              | Parkinson's disease | 16.800 | 0.209 | fixed effects                 |
| met-a-556 | X-11859                              | Parkinson's disease | 5.998  | 0.916 | fixed effects                 |
| met-a-557 | X-11876                              | Parkinson's disease | 9.858  | 0.772 | fixed effects                 |
| met-a-558 | 1-arachidonoylglycerophosphocholine* | Parkinson's disease | 34.870 | 0.029 | multiplicative random effects |
| met-a-559 | 1-palmitoleoylglycerophosphocholine* | Parkinson's disease | 6.629  | 0.920 | fixed effects                 |
| met-a-560 | X-11905                              | Parkinson's disease | 6.029  | 0.979 | fixed effects                 |
| met-a-561 | X-12007                              | Parkinson's disease | 19.387 | 0.307 | fixed effects                 |
| met-a-562 | X-12013                              | Parkinson's disease | 8.511  | 0.385 | fixed effects                 |
| met-a-563 | Gamma-glutamylmethionine*            | Parkinson's disease | 5.451  | 0.709 | fixed effects                 |
| met-a-564 | Gamma-glutamylthreonine*             | Parkinson's disease | 8.049  | 0.529 | fixed effects                 |
| met-a-565 | X-12029                              | Parkinson's disease | 56.079 | 0.018 | multiplicative random effects |
| met-a-566 | X-12038                              | Parkinson's disease | 70.817 | 0.042 | multiplicative random effects |
| met-a-567 | X-12039                              | Parkinson's disease | 16.410 | 0.228 | fixed effects                 |

|           |                                             |                     |        |       |                               |
|-----------|---------------------------------------------|---------------------|--------|-------|-------------------------------|
| met-a-568 | X-12040                                     | Parkinson's disease | 9.190  | 0.819 | fixed effects                 |
| met-a-569 | X-12056                                     | Parkinson's disease | 16.265 | 0.235 | fixed effects                 |
| met-a-570 | X-12063                                     | Parkinson's disease | 13.044 | 0.599 | fixed effects                 |
| met-a-571 | Gamma-tocopherol                            | Parkinson's disease | 11.545 | 0.483 | fixed effects                 |
| met-a-572 | Gamma-glutamylphenylalanine                 | Parkinson's disease | 38.598 | 0.269 | fixed effects                 |
| met-a-573 | Isobutyrylcarnitine                         | Parkinson's disease | 5.371  | 0.717 | fixed effects                 |
| met-a-574 | Pseudouridine                               | Parkinson's disease | 22.408 | 0.612 | fixed effects                 |
| met-a-575 | Valerate                                    | Parkinson's disease | 11.464 | 0.245 | fixed effects                 |
| met-a-576 | Palmitoleate (16:1n7)                       | Parkinson's disease | 5.418  | 0.712 | fixed effects                 |
| met-a-577 | Alpha-ketoglutarate                         | Parkinson's disease | 9.496  | 0.892 | fixed effects                 |
| met-a-578 | Erythronate*                                | Parkinson's disease | 51.987 | 0.191 | fixed effects                 |
| met-a-579 | Lathosterol                                 | Parkinson's disease | 12.090 | 0.795 | fixed effects                 |
| met-a-580 | X-12092                                     | Parkinson's disease | 21.502 | 0.368 | fixed effects                 |
| met-a-581 | X-12093                                     | Parkinson's disease | 9.729  | 0.555 | fixed effects                 |
| met-a-582 | X-12094                                     | Parkinson's disease | 25.537 | 0.001 | multiplicative random effects |
| met-a-583 | X-12095--N1-methyl-3-pyridone-4-carboxamide | Parkinson's disease | 37.622 | 0.028 | multiplicative random effects |
| met-a-584 | X-12100--hydroxytryptophan*                 | Parkinson's disease | 44.730 | 0.280 | fixed effects                 |
| met-a-585 | X-12116                                     | Parkinson's disease | 17.877 | 0.022 | multiplicative random effects |
| met-a-586 | Eicosenoate (20:1n9 or 11)                  | Parkinson's disease | 8.320  | 0.684 | fixed effects                 |
| met-a-587 | X-12188                                     | Parkinson's disease | 25.837 | 0.213 | fixed effects                 |
| met-a-588 | X-12189                                     | Parkinson's disease | 31.775 | 0.201 | fixed effects                 |
| met-a-589 | X-12206                                     | Parkinson's disease | 13.045 | 0.221 | fixed effects                 |
| met-a-590 | X-12212                                     | Parkinson's disease | 10.120 | 0.605 | fixed effects                 |
| met-a-591 | X-12216                                     | Parkinson's disease | 9.347  | 0.406 | fixed effects                 |
| met-a-592 | X-12217                                     | Parkinson's         | 7.858  | 0.447 | fixed effects                 |

|           |                                                    |                     |        |       |                               |
|-----------|----------------------------------------------------|---------------------|--------|-------|-------------------------------|
|           |                                                    | disease             |        |       |                               |
| met-a-593 | X-12230                                            | Parkinson's disease | 15.309 | 0.053 | fixed effects                 |
| met-a-594 | X-12231                                            | Parkinson's disease | 22.720 | 0.030 | multiplicative random effects |
| met-a-595 | X-12236                                            | Parkinson's disease | 18.246 | 0.019 | multiplicative random effects |
| met-a-596 | X-12244--N-acetylcarnosine                         | Parkinson's disease | 17.941 | 0.709 | fixed effects                 |
| met-a-597 | X-12253                                            | Parkinson's disease | 11.011 | 0.138 | fixed effects                 |
| met-a-598 | X-12261                                            | Parkinson's disease | 12.054 | 0.360 | fixed effects                 |
| met-a-599 | X-12329                                            | Parkinson's disease | 21.275 | 0.728 | fixed effects                 |
| met-a-600 | X-10346                                            | Parkinson's disease | 14.064 | 0.663 | fixed effects                 |
| met-a-601 | ADpSGEGDFXAEGGGVR*                                 | Parkinson's disease | 2.398  | 0.663 | fixed effects                 |
| met-a-602 | 1-<br>eicosatrienoylglycerophosphocholine*         | Parkinson's disease | 22.307 | 0.269 | fixed effects                 |
| met-a-603 | 1-<br>docosahexaenoylglycerophosphocholine*        | Parkinson's disease | 7.585  | 0.270 | fixed effects                 |
| met-a-604 | X-12405                                            | Parkinson's disease | 2.035  | 0.958 | fixed effects                 |
| met-a-605 | X-12407                                            | Parkinson's disease | 5.737  | 0.677 | fixed effects                 |
| met-a-606 | X-12428                                            | Parkinson's disease | 11.393 | 0.180 | fixed effects                 |
| met-a-607 | 1-<br>eicosadienoylglycerophosphocholine*          | Parkinson's disease | 5.128  | 0.925 | fixed effects                 |
| met-a-608 | X-12435                                            | Parkinson's disease | 18.160 | 0.836 | fixed effects                 |
| met-a-609 | X-12441--12-<br>hydroxyeicosatetraenoate (12-HETE) | Parkinson's disease | 14.703 | 0.326 | fixed effects                 |
| met-a-610 | X-12442--5,8-<br>tetradecadienoate                 | Parkinson's disease | 8.358  | 0.757 | fixed effects                 |
| met-a-611 | X-12443                                            | Parkinson's disease | 20.807 | 0.053 | fixed effects                 |
| met-a-612 | X-12450                                            | Parkinson's disease | 35.232 | 0.197 | fixed effects                 |
| met-a-613 | X-12456                                            | Parkinson's disease | 17.589 | 0.614 | fixed effects                 |
| met-a-614 | X-12465                                            | Parkinson's disease | 12.906 | 0.300 | fixed effects                 |

|           |                                            |                     |        |       |                               |
|-----------|--------------------------------------------|---------------------|--------|-------|-------------------------------|
| met-a-615 | Octanoylcarnitine                          | Parkinson's disease | 18.636 | 0.179 | fixed effects                 |
| met-a-616 | Alpha-hydroxyisovalerate                   | Parkinson's disease | 13.163 | 0.435 | fixed effects                 |
| met-a-617 | N-acetylthreonine                          | Parkinson's disease | 10.563 | 0.481 | fixed effects                 |
| met-a-618 | Decanoylcarnitine                          | Parkinson's disease | 7.345  | 0.884 | fixed effects                 |
| met-a-619 | 1-palmitoylglycerophosphocholine           | Parkinson's disease | 33.934 | 0.374 | fixed effects                 |
| met-a-620 | 1-heptadecanoylglycerophosphocholine       | Parkinson's disease | 17.715 | 0.060 | fixed effects                 |
| met-a-621 | 1-oleoylglycerophosphocholine              | Parkinson's disease | 17.668 | 0.281 | fixed effects                 |
| met-a-622 | 1-stearoylglycerophosphocholine            | Parkinson's disease | 11.387 | 0.411 | fixed effects                 |
| met-a-623 | 5-dodecenoate (12:1n7)                     | Parkinson's disease | 41.787 | 0.001 | multiplicative random effects |
| met-a-624 | Stearidonate (18:4n3)                      | Parkinson's disease | 6.419  | 0.779 | fixed effects                 |
| met-a-625 | 10-heptadecenoate (17:1n7)                 | Parkinson's disease | 1.458  | 0.918 | fixed effects                 |
| met-a-626 | 10-nonadecenoate (19:1n9)                  | Parkinson's disease | 9.470  | 0.149 | fixed effects                 |
| met-a-627 | Epiandrosterone sulfate                    | Parkinson's disease | 6.428  | 0.843 | fixed effects                 |
| met-a-628 | Linolenate [alpha or gamma; (18:3n3 or 6)] | Parkinson's disease | 4.484  | 0.344 | fixed effects                 |
| met-a-629 | X-12510--2-aminooctanoic acid              | Parkinson's disease | 9.925  | 0.768 | fixed effects                 |
| met-a-630 | X-12524                                    | Parkinson's disease | 19.177 | 0.863 | fixed effects                 |
| met-a-631 | Bilirubin (E,Z or Z,E)*                    | Parkinson's disease | 17.690 | 0.342 | fixed effects                 |
| met-a-632 | X-12544                                    | Parkinson's disease | 6.997  | 0.984 | fixed effects                 |
| met-a-633 | X-12556                                    | Parkinson's disease | 29.983 | 0.070 | fixed effects                 |
| met-a-634 | 1-arachidonoylglycerophosphoinositol*      | Parkinson's disease | 29.079 | 0.023 | multiplicative random effects |
| met-a-635 | X-12627                                    | Parkinson's disease | 10.223 | 0.421 | fixed effects                 |
| met-a-636 | X-12644                                    | Parkinson's disease | 18.047 | 0.584 | fixed effects                 |
| met-a-637 | X-12645                                    | Parkinson's         | 23.940 | 0.157 | fixed effects                 |

|           |                                      |                     |        |       |                               |
|-----------|--------------------------------------|---------------------|--------|-------|-------------------------------|
|           |                                      | disease             |        |       |                               |
| met-a-638 | Asparagine                           | Parkinson's disease | 52.038 | 0.064 | fixed effects                 |
| met-a-639 | X-12680                              | Parkinson's disease | 14.194 | 0.288 | fixed effects                 |
| met-a-640 | X-12696                              | Parkinson's disease | 37.571 | 0.014 | multiplicative random effects |
| met-a-641 | X-12704                              | Parkinson's disease | 7.781  | 0.733 | fixed effects                 |
| met-a-642 | X-12712                              | Parkinson's disease | 35.030 | 0.608 | fixed effects                 |
| met-a-643 | X-12717                              | Parkinson's disease | 7.224  | 0.513 | fixed effects                 |
| met-a-644 | X-12719                              | Parkinson's disease | 17.306 | 0.099 | fixed effects                 |
| met-a-645 | X-12726                              | Parkinson's disease | 25.732 | 0.217 | fixed effects                 |
| met-a-646 | X-12728                              | Parkinson's disease | 37.027 | 0.514 | fixed effects                 |
| met-a-647 | X-12729                              | Parkinson's disease | 8.668  | 0.950 | fixed effects                 |
| met-a-648 | X-12734                              | Parkinson's disease | 4.067  | 0.944 | fixed effects                 |
| met-a-649 | X-12740                              | Parkinson's disease | 11.271 | 0.506 | fixed effects                 |
| met-a-650 | X-12749                              | Parkinson's disease | 74.332 | 0.001 | multiplicative random effects |
| met-a-651 | Stachydrine                          | Parkinson's disease | 1.934  | 0.858 | fixed effects                 |
| met-a-652 | Isovalerylcarnitine                  | Parkinson's disease | 9.867  | 0.936 | fixed effects                 |
| met-a-653 | Stearoylcarnitine                    | Parkinson's disease | 7.222  | 0.205 | fixed effects                 |
| met-a-654 | 1-stearoylglycerophosphoethanolamine | Parkinson's disease | 25.225 | 0.003 | multiplicative random effects |
| met-a-655 | 1-linoleoylglycerophosphocholine     | Parkinson's disease | 17.364 | 0.237 | fixed effects                 |
| met-a-656 | Bradykinin, des-arg(9)               | Parkinson's disease | 14.582 | 0.749 | fixed effects                 |
| met-a-657 | X-12771                              | Parkinson's disease | 17.130 | 0.249 | fixed effects                 |
| met-a-658 | X-12776                              | Parkinson's disease | 0.712  | 0.701 | fixed effects                 |
| met-a-659 | Gamma-glutamylisoleucine*            | Parkinson's disease | 19.724 | 0.658 | fixed effects                 |
| met-a-660 | X-12786                              | Parkinson's disease | 13.914 | 0.238 | fixed effects                 |

|           |                                           |                     |        |       |                               |
|-----------|-------------------------------------------|---------------------|--------|-------|-------------------------------|
| met-a-661 | X-12798                                   | Parkinson's disease | 8.265  | 0.408 | fixed effects                 |
| met-a-662 | X-12816                                   | Parkinson's disease | 4.734  | 0.578 | fixed effects                 |
| met-a-663 | X-12830                                   | Parkinson's disease | 7.062  | 0.853 | fixed effects                 |
| met-a-664 | X-12833                                   | Parkinson's disease | 11.290 | 0.914 | fixed effects                 |
| met-a-665 | X-12844                                   | Parkinson's disease | 12.631 | 0.477 | fixed effects                 |
| met-a-666 | X-12847                                   | Parkinson's disease | 2.710  | 0.975 | fixed effects                 |
| met-a-667 | X-12850                                   | Parkinson's disease | 17.007 | 0.318 | fixed effects                 |
| met-a-668 | Laurylcarnitine                           | Parkinson's disease | 10.845 | 0.542 | fixed effects                 |
| met-a-669 | X-12851                                   | Parkinson's disease | 7.589  | 0.370 | fixed effects                 |
| met-a-670 | X-12855                                   | Parkinson's disease | 11.491 | 0.830 | fixed effects                 |
| met-a-671 | X-12990--docosapentaenoic acid (n6-DPA)   | Parkinson's disease | 15.793 | 0.201 | fixed effects                 |
| met-a-672 | Isovalerate                               | Parkinson's disease | 1.529  | 0.676 | fixed effects                 |
| met-a-673 | X-13069                                   | Parkinson's disease | 12.267 | 0.725 | fixed effects                 |
| met-a-674 | X-13183--stearamide                       | Parkinson's disease | 5.540  | 0.852 | fixed effects                 |
| met-a-675 | X-13215                                   | Parkinson's disease | 38.568 | 0.579 | fixed effects                 |
| met-a-676 | 7-methylguanane                           | Parkinson's disease | 2.564  | 0.990 | fixed effects                 |
| met-a-677 | Phenylacetylglutamine                     | Parkinson's disease | 21.299 | 0.213 | fixed effects                 |
| met-a-678 | Pro-hydroxy-pro                           | Parkinson's disease | 37.312 | 0.005 | multiplicative random effects |
| met-a-679 | N2,N2-dimethylguanosine                   | Parkinson's disease | 54.061 | 0.396 | fixed effects                 |
| met-a-680 | Cysteine-glutathione disulfide            | Parkinson's disease | 13.283 | 0.065 | fixed effects                 |
| met-a-681 | Oleoylcarnitine                           | Parkinson's disease | 11.274 | 0.421 | fixed effects                 |
| met-a-682 | 1-arachidonoylglycerophosphoethanolamine* | Parkinson's disease | 20.700 | 0.415 | fixed effects                 |
| met-a-683 | X-13429                                   | Parkinson's disease | 6.298  | 0.391 | fixed effects                 |
| met-a-684 | X-13431--nonanoylcarnitine*               | Parkinson's disease | 15.611 | 0.210 | fixed effects                 |

|           |                                    |                     |        |          |                               |
|-----------|------------------------------------|---------------------|--------|----------|-------------------------------|
| met-a-685 | X-13435                            | Parkinson's disease | 24.291 | 0.230    | fixed effects                 |
| met-a-686 | X-13477                            | Parkinson's disease | 10.975 | 0.140    | fixed effects                 |
| met-a-687 | 2-palmitoylglycerophosphocholine*  | Parkinson's disease | 36.354 | 0.010    | multiplicative random effects |
| met-a-688 | 2-oleoylglycerophosphocholine*     | Parkinson's disease | 20.063 | 0.271    | fixed effects                 |
| met-a-689 | 2-stearoylglycerophosphocholine*   | Parkinson's disease | 10.694 | 0.469    | fixed effects                 |
| met-a-690 | 2-linoleoylglycerophosphocholine*  | Parkinson's disease | 19.147 | 0.383    | fixed effects                 |
| met-a-691 | X-13496                            | Parkinson's disease | 28.718 | 0.833    | fixed effects                 |
| met-a-692 | 1-palmitoylglycerophosphoinositol* | Parkinson's disease | 21.327 | 0.011    | multiplicative random effects |
| met-a-693 | X-13548                            | Parkinson's disease | 40.734 | 0.570    | fixed effects                 |
| met-a-694 | X-13549                            | Parkinson's disease | 15.266 | 0.505    | fixed effects                 |
| met-a-695 | X-13553                            | Parkinson's disease | 3.860  | 0.796    | fixed effects                 |
| met-a-696 | X-13619                            | Parkinson's disease | 28.694 | 0.534    | fixed effects                 |
| met-a-697 | 2-methylbutyrylcarnitine           | Parkinson's disease | 31.234 | 0.070    | fixed effects                 |
| met-a-698 | Hydroxyisovaleroyl carnitine       | Parkinson's disease | 33.166 | 2.47E-05 | multiplicative random effects |
| met-a-699 | Glutaroyl carnitine                | Parkinson's disease | 27.766 | 0.477    | fixed effects                 |
| met-a-700 | X-13658                            | Parkinson's disease | 20.642 | 0.243    | fixed effects                 |
| met-a-701 | X-13671                            | Parkinson's disease | 16.732 | 0.271    | fixed effects                 |
| met-a-702 | 2-tetradecenoyl carnitine          | Parkinson's disease | 14.395 | 0.639    | fixed effects                 |
| met-a-703 | 4-hydroxyhippurate                 | Parkinson's disease | 11.916 | 0.103    | fixed effects                 |
| met-a-704 | X-13741                            | Parkinson's disease | 15.144 | 0.176    | fixed effects                 |
| met-a-705 | 1-myristoylglycerophosphocholine   | Parkinson's disease | 17.296 | 0.004    | multiplicative random effects |
| met-a-706 | 1-                                 | Parkinson's         | 22.928 | 0.003    | multiplicative random         |

|           |                                       |                     |        |       |               |
|-----------|---------------------------------------|---------------------|--------|-------|---------------|
|           | oleoylglycerophosphoethanol amine     | disease             |        |       | effects       |
| met-a-707 | 1-palmitoylglycerophosphoethanolamine | Parkinson's disease | 29.384 | 0.206 | fixed effects |
| met-a-708 | 3-(3-hydroxyphenyl)propionate         | Parkinson's disease | 9.441  | 0.398 | fixed effects |
| met-a-709 | Tetradecanedioate                     | Parkinson's disease | 22.066 | 0.281 | fixed effects |
| met-a-710 | 2-hydroxypalmitate                    | Parkinson's disease | 40.434 | 0.625 | fixed effects |
| met-a-711 | Hexadecanedioate                      | Parkinson's disease | 26.164 | 0.293 | fixed effects |
| met-a-712 | Dihomo-linolenate (20:3n3 or n6)      | Parkinson's disease | 30.575 | 0.081 | fixed effects |
| met-a-713 | X-13859                               | Parkinson's disease | 40.303 | 0.369 | fixed effects |
| met-a-714 | Threitol                              | Parkinson's disease | 6.612  | 0.882 | fixed effects |
| met-a-715 | X-14056                               | Parkinson's disease | 5.393  | 0.612 | fixed effects |
| met-a-716 | X-14057                               | Parkinson's disease | 22.928 | 0.086 | fixed effects |
| met-a-717 | X-14086                               | Parkinson's disease | 15.210 | 0.230 | fixed effects |
| met-a-718 | P-cresol sulfate                      | Parkinson's disease | 19.728 | 0.139 | fixed effects |
| met-a-719 | X-14189--leucylalanine                | Parkinson's disease | 4.996  | 0.891 | fixed effects |
| met-a-720 | X-14205--alpha-glutamyltyrosine       | Parkinson's disease | 19.418 | 0.150 | fixed effects |
| met-a-721 | X-14208--phenylalanylserine           | Parkinson's disease | 20.191 | 0.064 | fixed effects |
| met-a-722 | X-14304--leucylalanine                | Parkinson's disease | 8.545  | 0.953 | fixed effects |
| met-a-723 | X-14374                               | Parkinson's disease | 8.634  | 0.280 | fixed effects |
| met-a-724 | X-14450--phenylalanylleucine          | Parkinson's disease | 3.869  | 0.424 | fixed effects |
| met-a-725 | X-14473                               | Parkinson's disease | 10.249 | 0.419 | fixed effects |
| met-a-726 | X-14541                               | Parkinson's disease | 21.239 | 0.096 | fixed effects |
| met-a-727 | X-14588                               | Parkinson's disease | 12.861 | 0.117 | fixed effects |
| met-a-728 | X-14625                               | Parkinson's disease | 18.640 | 0.231 | fixed effects |
| met-a-729 | X-14626                               | Parkinson's disease | 18.696 | 0.285 | fixed effects |

|           |                                                |                     |        |          |                               |
|-----------|------------------------------------------------|---------------------|--------|----------|-------------------------------|
| met-a-730 | X-14632                                        | Parkinson's disease | 16.699 | 0.475    | fixed effects                 |
| met-a-731 | X-14658                                        | Parkinson's disease | 30.971 | 5.93E-04 | multiplicative random effects |
| met-a-732 | X-14662                                        | Parkinson's disease | 10.048 | 0.930    | fixed effects                 |
| met-a-733 | X-14745                                        | Parkinson's disease | 21.553 | 0.043    | multiplicative random effects |
| met-a-734 | Gamma-glutamylglutamate                        | Parkinson's disease | 11.435 | 0.247    | fixed effects                 |
| met-a-735 | Octadecanedioate                               | Parkinson's disease | 13.872 | 0.085    | fixed effects                 |
| met-a-736 | Leucylleucine                                  | Parkinson's disease | 4.741  | 0.856    | fixed effects                 |
| met-a-737 | 7-alpha-hydroxy-3-oxo-4-cholestenoate (7-Hoca) | Parkinson's disease | 12.666 | 0.553    | fixed effects                 |
| met-a-738 | N-Butyl Oleate                                 | Parkinson's disease | 14.748 | 0.098    | fixed effects                 |
| met-a-739 | Dimethylarginine (SDMA + ADMA)                 | Parkinson's disease | 38.234 | 0.207    | fixed effects                 |
| met-a-740 | Taurolithocholate 3-sulfate                    | Parkinson's disease | 7.065  | 0.630    | fixed effects                 |
| met-a-741 | X-14977--vanillin                              | Parkinson's disease | 4.780  | 0.853    | fixed effects                 |
| met-a-742 | Succinylcarnitine                              | Parkinson's disease | 34.914 | 0.657    | fixed effects                 |
| met-a-743 | Tryptophan betaine                             | Parkinson's disease | 16.510 | 0.057    | fixed effects                 |
| met-a-744 | Cyclo(leu-pro)                                 | Parkinson's disease | 13.544 | 0.633    | fixed effects                 |
| met-a-745 | Chiro-inositol                                 | Parkinson's disease | 11.536 | 0.566    | fixed effects                 |
| met-a-746 | 5alpha-androstan-3beta,17beta-diol disulfate   | Parkinson's disease | 8.078  | 0.921    | fixed effects                 |
| met-a-747 | 4-androsten-3beta,17beta-diol disulfate 1*     | Parkinson's disease | 13.367 | 0.769    | fixed effects                 |
| met-a-748 | 4-androsten-3beta,17beta-diol disulfate 2*     | Parkinson's disease | 13.743 | 0.618    | fixed effects                 |
| met-a-749 | 2-hydroxyglutarate                             | Parkinson's disease | 13.748 | 0.317    | fixed effects                 |
| met-a-750 | Ergothioneine                                  | Parkinson's disease | 0.556  | 0.757    | fixed effects                 |
| met-a-751 | Palmitoyl sphingomyelin                        | Parkinson's disease | 44.596 | 0.323    | fixed effects                 |
| met-a-752 | Phenylalanylphenylalanine                      | Parkinson's disease | 2.514  | 0.473    | fixed effects                 |
| met-a-753 | Cis-4-decenoyl carnitine                       | Parkinson's disease | 3.952  | 0.861    | fixed effects                 |
| met-a-754 | 15-methylpalmitate (isobar                     | Parkinson's         | 11.857 | 0.539    | fixed effects                 |

|  |                         |         |  |  |  |
|--|-------------------------|---------|--|--|--|
|  | with 2-methylpalmitate) | disease |  |  |  |
|--|-------------------------|---------|--|--|--|

**Table S5. The associations of 452 human blood metabolites with the risk of Parkinson's disease using the inverse-variance weighted mendelian randomization analysis.**

| ID        | Exposure                 | nSNP | IVW                |         |
|-----------|--------------------------|------|--------------------|---------|
|           |                          |      | OR (95% CI)        | P value |
| met-a-303 | Glutamine                | 8    | 1.57 (0.05-46.41)  | 0.795   |
| met-a-304 | Tryptophan               | 148  | 0.65 (0.31-1.36)   | 0.249   |
| met-a-305 | Histidine                | 7    | 1.44 (0.19-11.02)  | 0.727   |
| met-a-306 | Leucine                  | 158  | 0.92 (0.46-1.81)   | 0.803   |
| met-a-307 | Cholesterol              | 44   | 0.69 (0.34-1.38)   | 0.294   |
| met-a-308 | Phenylalanine            | 5    | 8.99 (0.58-138.50) | 0.115   |
| met-a-309 | Creatinine               | 24   | 1.22 (0.36-4.09)   | 0.752   |
| met-a-310 | Lactate                  | 12   | 0.34 (0.07-1.62)   | 0.175   |
| met-a-311 | 3-hydroxybutyrate (BHBA) | 10   | 1.05 (0.85-1.29)   | 0.638   |
| met-a-312 | Arabinose                | 6    | 1.42 (1.05-1.91)   | 0.021   |
| met-a-313 | Fructose                 | 3    | 2.27 (0.62-8.27)   | 0.213   |
| met-a-314 | Mannose                  | 18   | 2.66 (1.28-5.53)   | 0.009   |
| met-a-315 | Pyruvate                 | 15   | 1.10 (0.65-1.87)   | 0.732   |
| met-a-316 | Uridine                  | 20   | 1.19 (0.39-3.61)   | 0.763   |
| met-a-317 | Linoleate (18:2n6)       | 16   | 0.88 (0.34-2.30)   | 0.799   |
| met-a-318 | Allantoin                | 20   | 0.85 (0.58-1.23)   | 0.385   |
| met-a-319 | Arachidonate (20:4n6)    | 21   | 0.83 (0.49-1.42)   | 0.503   |
| met-a-320 | Deoxycholate             | 17   | 1.03 (0.78-1.35)   | 0.852   |
| met-a-321 | Margarate (17:0)         | 7    | 0.60 (0.23-1.54)   | 0.285   |
| met-a-322 | Inosine                  | 10   | 0.79 (0.69-0.91)   | 0.001   |
| met-a-323 | Isoleucine               | 18   | 0.94 (0.26-3.48)   | 0.929   |
| met-a-324 | Threonine                | 18   | 1.27 (0.38-4.26)   | 0.698   |
| met-a-325 | Tyrosine                 | 31   | 0.76 (0.29-1.98)   | 0.581   |
| met-a-326 | Lysine                   | 22   | 0.75 (0.22-2.51)   | 0.636   |
| met-a-327 | Methionine               | 20   | 1.41 (0.30-6.58)   | 0.663   |
| met-a-328 | Malate                   | 18   | 0.74 (0.38-1.48)   | 0.400   |
| met-a-329 | Palmitate (16:0)         | 27   | 0.56 (0.23-1.38)   | 0.209   |
| met-a-330 | Nonadecanoate (19:0)     | 15   | 0.88 (0.48-1.62)   | 0.688   |
| met-a-331 | Stearate (18:0)          | 42   | 0.59 (0.30-1.18)   | 0.137   |
| met-a-332 | Oleate (18:1n9)          | 20   | 0.62 (0.25-1.53)   | 0.304   |
| met-a-333 | Pentadecanoate (15:0)    | 20   | 0.69 (0.32-1.49)   | 0.346   |
| met-a-334 | Myristate (14:0)         | 22   | 0.70 (0.38-1.31)   | 0.265   |
| met-a-335 | Pipecolate               | 14   | 1.64 (0.96-2.79)   | 0.070   |
| met-a-336 | Ornithine                | 8    | 1.25 (0.39-3.97)   | 0.711   |
| met-a-337 | 5-oxoproline             | 22   | 0.93 (0.45-1.93)   | 0.849   |
| met-a-338 | Pantothenate             | 25   | 0.61 (0.35-1.06)   | 0.079   |

|           |                            |     |                  |       |
|-----------|----------------------------|-----|------------------|-------|
| met-a-339 | 4-acetamidobutanoate       | 33  | 1.20 (0.59-2.43) | 0.610 |
| met-a-340 | Alpha-tocopherol           | 11  | 0.78 (0.38-1.61) | 0.499 |
| met-a-341 | Citrate                    | 42  | 0.96 (0.40-2.32) | 0.927 |
| met-a-342 | Glycerate                  | 17  | 0.43 (0.18-1.06) | 0.066 |
| met-a-343 | Guanosine                  | 13  | 0.91 (0.66-1.25) | 0.552 |
| met-a-344 | N-acetylalanine            | 21  | 1.69 (0.42-6.74) | 0.457 |
| met-a-345 | Urate                      | 19  | 0.93 (0.39-2.22) | 0.864 |
| met-a-346 | Ursodeoxycholate           | 11  | 1.12 (0.82-1.52) | 0.485 |
| met-a-347 | Arginine                   | 21  | 0.58 (0.28-1.22) | 0.151 |
| met-a-348 | Ascorbate (Vitamin C)      | 14  | 0.85 (0.73-0.98) | 0.022 |
| met-a-349 | Heptanoate (7:0)           | 34  | 0.60 (0.28-1.27) | 0.181 |
| met-a-350 | Laurate (12:0)             | 39  | 0.54 (0.27-1.12) | 0.098 |
| met-a-351 | Valine                     | 6   | 0.46 (0.09-2.36) | 0.352 |
| met-a-352 | Urea                       | 15  | 1.97 (0.74-5.24) | 0.172 |
| met-a-353 | Cortisol                   | 13  | 0.82 (0.44-1.56) | 0.555 |
| met-a-354 | Cortisone                  | 32  | 0.81 (0.39-1.70) | 0.583 |
| met-a-355 | Proline                    | 34  | 0.86 (0.51-1.46) | 0.584 |
| met-a-356 | Citrulline                 | 41  | 0.66 (0.33-1.33) | 0.249 |
| met-a-357 | Biliverdin                 | 15  | 0.98 (0.76-1.27) | 0.899 |
| met-a-358 | Serotonin (5HT)            | 15  | 0.54 (0.30-0.96) | 0.036 |
| met-a-359 | Gamma-glutamylglutamine    | 21  | 1.38 (0.52-3.66) | 0.523 |
| met-a-360 | Gamma-glutamyltyrosine     | 44  | 2.06 (1.07-3.99) | 0.031 |
| met-a-361 | Hypoxanthine               | 22  | 1.63 (0.85-3.10) | 0.139 |
| met-a-362 | Betaine                    | 22  | 0.76 (0.39-1.46) | 0.404 |
| met-a-363 | Xanthine                   | 3   | 0.73 (0.16-3.22) | 0.673 |
| met-a-364 | Phosphate                  | 5   | 1.17 (0.21-6.52) | 0.856 |
| met-a-365 | 3-methoxytyrosine          | 16  | 1.76 (0.73-4.27) | 0.212 |
| met-a-366 | Pelargonate (9:0)          | 33  | 1.06 (0.50-2.25) | 0.874 |
| met-a-367 | Undecanoate (11:0)         | 27  | 1.16 (0.33-4.01) | 0.819 |
| met-a-368 | Beta-hydroxyisovalerate    | 23  | 0.67 (0.27-1.65) | 0.388 |
| met-a-369 | Taurodeoxycholate          | 13  | 1.07 (0.85-1.35) | 0.553 |
| met-a-370 | X-02973                    | 24  | 0.46 (0.16-1.36) | 0.163 |
| met-a-371 | X-03003                    | 8   | 2.30 (0.62-8.57) | 0.215 |
| met-a-372 | X-03088                    | 19  | 1.33 (0.74-2.41) | 0.342 |
| met-a-373 | X-03094                    | 29  | 0.94 (0.37-2.42) | 0.905 |
| met-a-374 | Glycerol                   | 18  | 1.30 (0.66-2.57) | 0.454 |
| met-a-375 | Kynurenine                 | 35  | 1.06 (0.56-1.99) | 0.858 |
| met-a-376 | Mannitol                   | 11  | 1.02 (0.83-1.26) | 0.829 |
| met-a-377 | Glycerol 3-phosphate (G3P) | 14  | 1.50 (0.40-5.66) | 0.548 |
| met-a-378 | Acetylphosphate            | 18  | 1.63 (0.43-6.22) | 0.473 |
| met-a-379 | Carnitine                  | 164 | 0.82 (0.41-1.65) | 0.575 |
| met-a-380 | Choline                    | 23  | 0.56 (0.15-2.14) | 0.396 |
| met-a-381 | N-acetylorithine           | 14  | 1.11 (0.87-1.41) | 0.402 |

|           |                                      |    |                  |       |
|-----------|--------------------------------------|----|------------------|-------|
| met-a-382 | N1-methyladenosine                   | 8  | 0.54 (0.05-5.26) | 0.594 |
| met-a-383 | 3-methyl-2-oxovalerate               | 32 | 0.40 (0.14-1.10) | 0.076 |
| met-a-384 | 3-methylhistidine                    | 9  | 1.16 (0.82-1.63) | 0.398 |
| met-a-385 | 3-phenylpropionate (hydrocinnamate)  | 13 | 1.76 (1.12-2.76) | 0.013 |
| met-a-386 | Phenylacetate                        | 8  | 0.89 (0.38-2.08) | 0.791 |
| met-a-387 | Glycerophosphorylcholine (GPC)       | 18 | 0.93 (0.66-1.29) | 0.651 |
| met-a-388 | Aspartate                            | 4  | 1.18 (0.46-3.04) | 0.738 |
| met-a-389 | X-04357                              | 10 | 0.94 (0.57-1.55) | 0.811 |
| met-a-390 | X-04494                              | 14 | 1.07 (0.52-2.21) | 0.856 |
| met-a-391 | X-04495                              | 11 | 1.51 (0.76-2.98) | 0.238 |
| met-a-392 | X-04498                              | 21 | 1.54 (0.87-2.72) | 0.139 |
| met-a-393 | X-04499--3,4-dihydroxybutyrate       | 23 | 0.80 (0.40-1.62) | 0.536 |
| met-a-394 | X-04500                              | 11 | 0.97 (0.82-1.16) | 0.774 |
| met-a-395 | Dihomo-linoleate (20:2n6)            | 8  | 0.60 (0.26-1.37) | 0.222 |
| met-a-396 | X-18601                              | 21 | 0.98 (0.72-1.35) | 0.923 |
| met-a-397 | 2-hydroxystearate                    | 34 | 0.54 (0.26-1.11) | 0.093 |
| met-a-398 | X-05426                              | 10 | 0.75 (0.38-1.47) | 0.401 |
| met-a-399 | Indolelactate                        | 17 | 1.02 (0.51-2.04) | 0.948 |
| met-a-400 | Glycylvaline                         | 7  | 0.89 (0.60-1.32) | 0.548 |
| met-a-401 | Gamma-glutamylleucine                | 31 | 0.86 (0.27-2.77) | 0.800 |
| met-a-402 | Eicosapentaenoate (EPA; 20:5n3)      | 12 | 1.30 (0.77-2.19) | 0.320 |
| met-a-403 | Estrone 3-sulfate                    | 12 | 0.96 (0.85-1.10) | 0.578 |
| met-a-404 | Glycocholate                         | 9  | 1.00 (0.76-1.33) | 0.977 |
| met-a-405 | Glycodeoxycholate                    | 7  | 0.93 (0.75-1.15) | 0.511 |
| met-a-406 | Taurochenodeoxycholate               | 13 | 1.01 (0.78-1.30) | 0.969 |
| met-a-407 | Taurocholate                         | 16 | 1.11 (0.94-1.31) | 0.222 |
| met-a-408 | X-05907                              | 12 | 1.44 (0.59-3.48) | 0.423 |
| met-a-409 | Docosahexaenoate (DHA; 22:6n3)       | 6  | 0.73 (0.15-3.45) | 0.690 |
| met-a-410 | 1-stearoylglycerophosphoinositol     | 7  | 0.53 (0.31-0.90) | 0.020 |
| met-a-411 | X-06226                              | 23 | 1.81 (0.70-4.65) | 0.220 |
| met-a-412 | X-06246                              | 20 | 0.83 (0.44-1.59) | 0.578 |
| met-a-413 | X-06267                              | 12 | 1.07 (0.47-2.45) | 0.879 |
| met-a-414 | X-06307                              | 8  | 1.52 (0.79-2.93) | 0.214 |
| met-a-415 | X-06350                              | 14 | 0.91 (0.48-1.73) | 0.770 |
| met-a-416 | X-06351                              | 5  | 1.12 (0.58-2.15) | 0.743 |
| met-a-417 | Myo-inositol                         | 37 | 1.01 (0.56-1.83) | 0.962 |
| met-a-418 | Glucose                              | 38 | 0.49 (0.21-1.10) | 0.084 |
| met-a-419 | 1,5-anhydroglucitol (1,5-AG)         | 28 | 1.05 (0.56-1.97) | 0.882 |
| met-a-420 | 2-hydroxybutyrate (AHB)              | 15 | 0.73 (0.33-1.63) | 0.446 |
| met-a-421 | 3-methyl-2-oxobutyrate               | 17 | 1.03 (0.38-2.81) | 0.956 |
| met-a-422 | 1,6-anhydroglucose                   | 15 | 1.16 (0.92-1.46) | 0.221 |
| met-a-423 | 1-palmitoylglycerol (1-monopalmitin) | 14 | 0.52 (0.19-1.40) | 0.196 |
| met-a-424 | 1-oleoylglycerol (1-monoolein)       | 15 | 1.19 (0.77-1.83) | 0.435 |

|           |                                                      |    |                  |       |
|-----------|------------------------------------------------------|----|------------------|-------|
| met-a-425 | 1-stearoylglycerol (1-monostearin)                   | 24 | 2.19 (1.24-3.87) | 0.007 |
| met-a-426 | X-08402                                              | 21 | 0.92 (0.58-1.45) | 0.714 |
| met-a-427 | 2-hydroxyisobutyrate                                 | 18 | 1.12 (0.55-2.26) | 0.763 |
| met-a-428 | X-08766                                              | 15 | 0.59 (0.33-1.06) | 0.076 |
| met-a-429 | 4-methyl-2-oxopentanoate                             | 14 | 1.28 (0.49-3.35) | 0.610 |
| met-a-430 | Phenyllactate (PLA)                                  | 17 | 0.78 (0.40-1.54) | 0.470 |
| met-a-431 | Homocitrulline                                       | 7  | 0.88 (0.46-1.67) | 0.700 |
| met-a-432 | Aspartylphenylalanine                                | 5  | 1.28 (0.74-2.24) | 0.379 |
| met-a-433 | Levulinate (4-oxovalerate)                           | 52 | 0.76 (0.41-1.39) | 0.374 |
| met-a-434 | Palmitoylcarnitine                                   | 9  | 0.70 (0.31-1.57) | 0.386 |
| met-a-435 | X-08988                                              | 31 | 0.73 (0.35-1.51) | 0.392 |
| met-a-436 | X-09026                                              | 15 | 0.78 (0.36-1.69) | 0.523 |
| met-a-437 | X-09108                                              | 13 | 0.35 (0.13-0.97) | 0.044 |
| met-a-438 | Cholate                                              | 8  | 1.11 (0.88-1.40) | 0.386 |
| met-a-439 | X-09706                                              | 22 | 0.80 (0.41-1.55) | 0.505 |
| met-a-440 | X-10395                                              | 29 | 0.90 (0.58-1.41) | 0.656 |
| met-a-441 | X-10429                                              | 21 | 0.78 (0.46-1.33) | 0.358 |
| met-a-442 | X-10500                                              | 33 | 0.77 (0.33-1.81) | 0.553 |
| met-a-443 | X-10506                                              | 13 | 0.77 (0.29-2.04) | 0.606 |
| met-a-444 | X-10510                                              | 22 | 1.28 (0.73-2.25) | 0.384 |
| met-a-445 | 1-linoleoylglycerol (1-monolinolein)                 | 15 | 0.95 (0.68-1.31) | 0.739 |
| met-a-446 | Indoleacetate                                        | 19 | 0.67 (0.39-1.16) | 0.153 |
| met-a-447 | Hyodeoxycholate                                      | 16 | 1.06 (0.78-1.44) | 0.727 |
| met-a-448 | 3-indoxyl sulfate                                    | 5  | 0.95 (0.52-1.76) | 0.877 |
| met-a-449 | N-acetylglycine                                      | 13 | 1.14 (0.76-1.71) | 0.532 |
| met-a-450 | Bilirubin (Z,Z)                                      | 9  | 0.94 (0.79-1.13) | 0.501 |
| met-a-451 | Creatine                                             | 7  | 0.87 (0.45-1.66) | 0.669 |
| met-a-452 | Erythrose                                            | 8  | 0.75 (0.37-1.55) | 0.444 |
| met-a-453 | Threonate                                            | 16 | 0.79 (0.48-1.30) | 0.344 |
| met-a-454 | X-10810                                              | 16 | 1.33 (0.84-2.10) | 0.218 |
| met-a-455 | Cysteine                                             | 18 | 0.74 (0.40-1.35) | 0.320 |
| met-a-456 | Pyroglutamylglycine                                  | 4  | 1.07 (0.67-1.73) | 0.767 |
| met-a-457 | N-(2-furoyl)glycine                                  | 25 | 0.96 (0.89-1.04) | 0.333 |
| met-a-458 | DSGEGDFXAEGGGVR*                                     | 13 | 1.16 (0.80-1.67) | 0.433 |
| met-a-459 | Pyridoxate                                           | 11 | 0.94 (0.57-1.56) | 0.820 |
| met-a-460 | Androsterone sulfate                                 | 18 | 0.86 (0.74-1.00) | 0.055 |
| met-a-461 | 3-carboxy-4-methyl-5-propyl-2-furanpropanoate (CMPF) | 13 | 0.75 (0.59-0.94) | 0.014 |
| met-a-462 | 3-(4-hydroxyphenyl)lactate                           | 24 | 0.86 (0.48-1.55) | 0.625 |
| met-a-463 | Acetylcarnitine                                      | 17 | 0.80 (0.31-2.05) | 0.640 |
| met-a-464 | Serine                                               | 30 | 2.17 (1.06-4.46) | 0.034 |
| met-a-465 | Trans-4-hydroxyproline                               | 6  | 1.54 (0.57-4.18) | 0.397 |
| met-a-466 | Glutamate                                            | 3  | 1.18 (0.31-4.55) | 0.806 |

|           |                                                      |    |                  |       |
|-----------|------------------------------------------------------|----|------------------|-------|
| met-a-467 | Hexanoylcarnitine                                    | 16 | 0.86 (0.58-1.26) | 0.436 |
| met-a-468 | Glycine                                              | 24 | 0.86 (0.43-1.68) | 0.653 |
| met-a-469 | Alanine                                              | 35 | 0.56 (0.26-1.22) | 0.143 |
| met-a-470 | Glycochenodeoxycholate                               | 14 | 0.92 (0.64-1.32) | 0.656 |
| met-a-471 | 2-aminobutyrate                                      | 39 | 0.93 (0.47-1.84) | 0.840 |
| met-a-472 | Scyllo-inositol                                      | 12 | 0.88 (0.57-1.35) | 0.550 |
| met-a-473 | Dodecanedioate                                       | 6  | 1.61 (0.88-2.92) | 0.119 |
| met-a-474 | Gamma-glutamylvaline                                 | 13 | 0.32 (0.10-1.02) | 0.054 |
| met-a-475 | Indolepropionate                                     | 16 | 1.16 (0.76-1.77) | 0.501 |
| met-a-476 | Butyrylcarnitine                                     | 24 | 0.90 (0.73-1.10) | 0.306 |
| met-a-477 | Myristoleate (14:1n5)                                | 14 | 0.88 (0.53-1.47) | 0.628 |
| met-a-478 | Dehydroisoandrosterone sulfate (DHEA-S)              | 20 | 0.85 (0.60-1.21) | 0.372 |
| met-a-479 | Propionylcarnitine                                   | 29 | 0.79 (0.46-1.37) | 0.402 |
| met-a-480 | Caproate (6:0)                                       | 33 | 0.55 (0.21-1.46) | 0.230 |
| met-a-481 | Caprylate (8:0)                                      | 41 | 0.98 (0.52-1.88) | 0.962 |
| met-a-482 | 10-undecenoate (11:1n1)                              | 25 | 0.90 (0.58-1.39) | 0.620 |
| met-a-483 | Docosapentaenoate (n3 DPA; 22:5n3)                   | 10 | 0.70 (0.39-1.27) | 0.242 |
| met-a-484 | X-11204                                              | 38 | 1.00 (0.44-2.24) | 0.992 |
| met-a-485 | X-02269                                              | 8  | 0.81 (0.56-1.15) | 0.239 |
| met-a-486 | Phenol sulfate                                       | 12 | 1.09 (0.59-2.02) | 0.781 |
| met-a-487 | X-06126                                              | 13 | 1.06 (0.67-1.68) | 0.805 |
| met-a-488 | X-07765                                              | 13 | 0.89 (0.70-1.11) | 0.297 |
| met-a-489 | X-11247                                              | 18 | 0.94 (0.73-1.20) | 0.597 |
| met-a-490 | X-11261                                              | 14 | 0.83 (0.57-1.22) | 0.355 |
| met-a-491 | Bilirubin (E,E)*                                     | 8  | 0.98 (0.77-1.25) | 0.901 |
| met-a-492 | X-02249                                              | 11 | 0.92 (0.48-1.76) | 0.794 |
| met-a-493 | Heme*                                                | 13 | 1.45 (0.90-2.32) | 0.126 |
| met-a-494 | X-11299                                              | 11 | 0.93 (0.70-1.24) | 0.628 |
| met-a-495 | X-11315                                              | 26 | 1.33 (0.68-2.59) | 0.403 |
| met-a-496 | X-11317                                              | 41 | 1.11 (0.55-2.21) | 0.772 |
| met-a-497 | 1-linoleoylglycerophosphoethanolamine*               | 13 | 0.89 (0.41-1.94) | 0.777 |
| met-a-498 | X-11327                                              | 31 | 1.01 (0.42-2.46) | 0.978 |
| met-a-499 | X-11334                                              | 26 | 0.88 (0.49-1.56) | 0.652 |
| met-a-500 | 3-dehydrocarnitine*                                  | 22 | 0.93 (0.50-1.72) | 0.806 |
| met-a-501 | Pyroglutamine*                                       | 17 | 1.17 (0.80-1.72) | 0.411 |
| met-a-502 | C-glycosyltryptophan*                                | 22 | 0.57 (0.13-2.44) | 0.447 |
| met-a-503 | X-11374                                              | 18 | 0.89 (0.67-1.18) | 0.400 |
| met-a-504 | X-11381                                              | 16 | 2.03 (0.89-4.60) | 0.091 |
| met-a-505 | X-03056--N-[3-(2-Oxopyrrolidin-1-yl)propyl]acetamide | 29 | 0.72 (0.48-1.09) | 0.119 |
| met-a-506 | X-11412                                              | 42 | 1.25 (0.67-2.32) | 0.489 |
| met-a-507 | X-01911                                              | 17 | 1.52 (1.14-2.03) | 0.004 |
| met-a-508 | X-11422--xanthine                                    | 7  | 0.48 (0.15-1.58) | 0.228 |

|           |                                                  |    |                   |       |
|-----------|--------------------------------------------------|----|-------------------|-------|
| met-a-509 | X-11423--O-sulfo-L-tyrosine                      | 47 | 0.67 (0.27-1.69)  | 0.400 |
| met-a-510 | X-09789                                          | 11 | 1.08 (0.75-1.57)  | 0.674 |
| met-a-511 | X-11437                                          | 15 | 1.15 (0.93-1.41)  | 0.192 |
| met-a-512 | X-11438                                          | 24 | 1.18 (0.71-1.98)  | 0.520 |
| met-a-513 | X-11440                                          | 19 | 0.87 (0.67-1.12)  | 0.266 |
| met-a-514 | X-11441                                          | 13 | 0.97 (0.74-1.26)  | 0.796 |
| met-a-515 | X-11442                                          | 17 | 0.88 (0.57-1.35)  | 0.556 |
| met-a-516 | X-11444                                          | 12 | 0.70 (0.38-1.30)  | 0.260 |
| met-a-517 | X-11445--5-alpha-pregnan-3beta,20alpha-disulfate | 16 | 1.02 (0.82-1.28)  | 0.831 |
| met-a-518 | X-11452                                          | 6  | 0.63 (0.38-1.05)  | 0.079 |
| met-a-519 | X-11469                                          | 17 | 0.83 (0.63-1.11)  | 0.206 |
| met-a-520 | X-11470                                          | 10 | 0.87 (0.49-1.53)  | 0.632 |
| met-a-521 | X-11478                                          | 11 | 0.80 (0.53-1.23)  | 0.313 |
| met-a-522 | X-11483                                          | 11 | 1.12 (0.89-1.41)  | 0.320 |
| met-a-523 | X-11485                                          | 6  | 0.71 (0.41-1.25)  | 0.238 |
| met-a-524 | X-11491                                          | 13 | 1.05 (0.79-1.39)  | 0.738 |
| met-a-525 | X-11497                                          | 15 | 0.60 (0.26-1.38)  | 0.230 |
| met-a-526 | HWESASXX*                                        | 6  | 0.89 (0.58-1.36)  | 0.587 |
| met-a-527 | X-11521                                          | 10 | 1.27 (0.73-2.22)  | 0.391 |
| met-a-528 | X-11529                                          | 12 | 1.04 (0.91-1.19)  | 0.585 |
| met-a-529 | X-11530                                          | 12 | 0.96 (0.73-1.27)  | 0.784 |
| met-a-530 | X-11537                                          | 6  | 0.89 (0.54-1.46)  | 0.643 |
| met-a-531 | X-11538                                          | 14 | 0.78 (0.58-1.06)  | 0.110 |
| met-a-532 | X-11540                                          | 8  | 0.94 (0.60-1.50)  | 0.810 |
| met-a-533 | X-11546                                          | 15 | 0.96 (0.74-1.24)  | 0.735 |
| met-a-534 | X-11550                                          | 21 | 2.58 (0.64-10.39) | 0.184 |
| met-a-535 | X-11552                                          | 15 | 0.99 (0.63-1.56)  | 0.969 |
| met-a-536 | X-11593--O-methylascorbate*                      | 45 | 0.97 (0.59-1.59)  | 0.912 |
| met-a-537 | Adrenate (22:4n6)                                | 11 | 0.61 (0.35-1.09)  | 0.096 |
| met-a-538 | Homostachydrine*                                 | 5  | 1.01 (0.54-1.86)  | 0.985 |
| met-a-539 | ADSGEGDFXAEGGGVR*                                | 11 | 0.86 (0.64-1.17)  | 0.343 |
| met-a-540 | X-11786--methylcysteine                          | 13 | 0.95 (0.63-1.45)  | 0.821 |
| met-a-541 | X-11787                                          | 24 | 1.44 (0.71-2.93)  | 0.318 |
| met-a-542 | X-11792                                          | 15 | 0.90 (0.75-1.07)  | 0.221 |
| met-a-543 | X-11793--oxidized bilirubin*                     | 14 | 0.98 (0.71-1.35)  | 0.895 |
| met-a-544 | X-11795                                          | 12 | 1.95 (0.94-4.04)  | 0.073 |
| met-a-545 | X-11799                                          | 7  | 1.06 (0.83-1.36)  | 0.630 |
| met-a-546 | X-11805                                          | 9  | 1.04 (0.86-1.26)  | 0.694 |
| met-a-547 | X-11818                                          | 19 | 1.00 (0.54-1.83)  | 0.987 |
| met-a-548 | X-11820                                          | 13 | 1.87 (1.28-2.73)  | 0.001 |
| met-a-549 | X-11843                                          | 3  | 0.79 (0.55-1.15)  | 0.217 |
| met-a-550 | X-11845                                          | 19 | 0.97 (0.82-1.14)  | 0.702 |

|           |                                             |    |                  |       |
|-----------|---------------------------------------------|----|------------------|-------|
| met-a-551 | X-11847                                     | 12 | 1.41 (1.12-1.78) | 0.004 |
| met-a-552 | X-11849                                     | 13 | 1.03 (0.85-1.24) | 0.771 |
| met-a-553 | X-11850                                     | 8  | 1.18 (0.93-1.49) | 0.180 |
| met-a-554 | X-11852                                     | 9  | 0.92 (0.62-1.37) | 0.687 |
| met-a-555 | X-11858                                     | 14 | 0.95 (0.82-1.11) | 0.532 |
| met-a-556 | X-11859                                     | 13 | 0.55 (0.28-1.08) | 0.082 |
| met-a-557 | X-11876                                     | 15 | 1.41 (0.93-2.14) | 0.107 |
| met-a-558 | 1-arachidonoylglycerophosphocholine*        | 22 | 0.57 (0.33-1.00) | 0.051 |
| met-a-559 | 1-palmitoleoylglycerophosphocholine*        | 14 | 1.02 (0.48-2.13) | 0.966 |
| met-a-560 | X-11905                                     | 16 | 0.96 (0.75-1.23) | 0.726 |
| met-a-561 | X-12007                                     | 18 | 0.94 (0.81-1.10) | 0.466 |
| met-a-562 | X-12013                                     | 9  | 1.11 (0.90-1.36) | 0.325 |
| met-a-563 | Gamma-glutamylmethionine*                   | 9  | 1.28 (0.69-2.38) | 0.437 |
| met-a-564 | Gamma-glutamylthreonine*                    | 10 | 0.77 (0.38-1.57) | 0.476 |
| met-a-565 | X-12029                                     | 37 | 0.43 (0.19-0.95) | 0.038 |
| met-a-566 | X-12038                                     | 53 | 0.86 (0.41-1.80) | 0.696 |
| met-a-567 | X-12039                                     | 14 | 1.04 (0.79-1.36) | 0.806 |
| met-a-568 | X-12040                                     | 15 | 1.02 (0.93-1.11) | 0.666 |
| met-a-569 | X-12056                                     | 14 | 1.14 (0.87-1.48) | 0.343 |
| met-a-570 | X-12063                                     | 16 | 1.10 (0.90-1.34) | 0.367 |
| met-a-571 | Gamma-tocopherol                            | 13 | 0.93 (0.66-1.31) | 0.680 |
| met-a-572 | Gamma-glutamylphenylalanine                 | 35 | 0.55 (0.27-1.14) | 0.107 |
| met-a-573 | Isobutyrylcarnitine                         | 9  | 0.68 (0.45-1.04) | 0.076 |
| met-a-574 | Pseudouridine                               | 26 | 0.53 (0.16-1.75) | 0.295 |
| met-a-575 | Valerate                                    | 10 | 1.32 (0.56-3.08) | 0.525 |
| met-a-576 | Palmitoleate (16:1n7)                       | 9  | 0.90 (0.46-1.75) | 0.747 |
| met-a-577 | Alpha-ketoglutarate                         | 17 | 0.80 (0.48-1.34) | 0.397 |
| met-a-578 | Erythronate*                                | 45 | 1.28 (0.64-2.54) | 0.488 |
| met-a-579 | Lathosterol                                 | 18 | 1.00 (0.72-1.38) | 0.979 |
| met-a-580 | X-12092                                     | 21 | 0.94 (0.83-1.07) | 0.352 |
| met-a-581 | X-12093                                     | 12 | 0.83 (0.68-1.01) | 0.065 |
| met-a-582 | X-12094                                     | 9  | 1.68 (0.55-5.10) | 0.360 |
| met-a-583 | X-12095--N1-methyl-3-pyridone-4-carboxamide | 24 | 1.41 (0.77-2.57) | 0.262 |
| met-a-584 | X-12100--hydroxytryptophan*                 | 41 | 0.95 (0.47-1.91) | 0.883 |
| met-a-585 | X-12116                                     | 9  | 0.76 (0.41-1.43) | 0.396 |
| met-a-586 | Eicosenoate (20:1n9 or 11)                  | 12 | 1.25 (0.69-2.28) | 0.456 |
| met-a-587 | X-12188                                     | 22 | 0.98 (0.89-1.07) | 0.602 |
| met-a-588 | X-12189                                     | 27 | 0.99 (0.92-1.07) | 0.860 |
| met-a-589 | X-12206                                     | 11 | 0.89 (0.44-1.80) | 0.749 |
| met-a-590 | X-12212                                     | 13 | 0.94 (0.69-1.28) | 0.696 |
| met-a-591 | X-12216                                     | 10 | 0.93 (0.65-1.33) | 0.696 |
| met-a-592 | X-12217                                     | 9  | 0.99 (0.59-1.68) | 0.982 |
| met-a-593 | X-12230                                     | 9  | 0.68 (0.45-1.02) | 0.062 |

|           |                                                |    |                  |          |
|-----------|------------------------------------------------|----|------------------|----------|
| met-a-594 | X-12231                                        | 13 | 1.13 (0.66-1.93) | 0.665    |
| met-a-595 | X-12236                                        | 9  | 1.57 (0.95-2.58) | 0.077    |
| met-a-596 | X-12244--N-acetylcarnosine                     | 23 | 0.76 (0.40-1.44) | 0.399    |
| met-a-597 | X-12253                                        | 8  | 0.94 (0.62-1.43) | 0.781    |
| met-a-598 | X-12261                                        | 12 | 1.08 (0.92-1.27) | 0.358    |
| met-a-599 | X-12329                                        | 27 | 0.99 (0.93-1.04) | 0.614    |
| met-a-600 | X-10346                                        | 18 | 0.97 (0.84-1.12) | 0.659    |
| met-a-601 | ADpSGEGDFXAEGGGVR*                             | 5  | 0.94 (0.55-1.60) | 0.812    |
| met-a-602 | 1-eicosatrienoylglycerophosphocholine*         | 20 | 1.08 (0.68-1.71) | 0.759    |
| met-a-603 | 1-docosahexaenoylglycerophosphocholine*        | 7  | 0.93 (0.41-2.12) | 0.858    |
| met-a-604 | X-12405                                        | 8  | 0.73 (0.44-1.22) | 0.233    |
| met-a-605 | X-12407                                        | 9  | 1.13 (0.88-1.45) | 0.346    |
| met-a-606 | X-12428                                        | 9  | 1.03 (0.73-1.45) | 0.876    |
| met-a-607 | 1-eicosadienoylglycerophosphocholine*          | 12 | 0.97 (0.60-1.58) | 0.907    |
| met-a-608 | X-12435                                        | 26 | 1.08 (1.01-1.16) | 0.031    |
| met-a-609 | X-12441--12-hydroxyeicosatetraenoate (12-HETE) | 14 | 1.06 (0.88-1.26) | 0.540    |
| met-a-610 | X-12442--5,8-tetradecadienoate                 | 13 | 1.30 (0.86-1.98) | 0.212    |
| met-a-611 | X-12443                                        | 13 | 0.95 (0.76-1.20) | 0.688    |
| met-a-612 | X-12450                                        | 30 | 0.54 (0.34-0.86) | 0.009    |
| met-a-613 | X-12456                                        | 21 | 0.99 (0.73-1.32) | 0.925    |
| met-a-614 | X-12465                                        | 12 | 0.73 (0.49-1.09) | 0.127    |
| met-a-615 | Octanoylcarnitine                              | 15 | 1.03 (0.73-1.45) | 0.865    |
| met-a-616 | Alpha-hydroxyisovalerate                       | 14 | 0.66 (0.41-1.05) | 0.078    |
| met-a-617 | N-acetylthreonine                              | 12 | 1.39 (0.55-3.52) | 0.486    |
| met-a-618 | Decanoylcarnitine                              | 14 | 1.14 (0.80-1.61) | 0.478    |
| met-a-619 | 1-palmitoylglycerophosphocholine               | 33 | 1.11 (0.44-2.81) | 0.825    |
| met-a-620 | 1-heptadecanoylglycerophosphocholine           | 11 | 0.98 (0.53-1.80) | 0.946    |
| met-a-621 | 1-oleoylglycerophosphocholine                  | 16 | 1.18 (0.53-2.67) | 0.682    |
| met-a-622 | 1-stearoylglycerophosphocholine                | 12 | 0.52 (0.25-1.08) | 0.081    |
| met-a-623 | 5-dodecenoate (12:1n7)                         | 19 | 0.95 (0.51-1.78) | 0.872    |
| met-a-624 | Stearidonate (18:4n3)                          | 11 | 0.71 (0.43-1.19) | 0.194    |
| met-a-625 | 10-heptadecenoate (17:1n7)                     | 6  | 0.42 (0.14-1.24) | 0.116    |
| met-a-626 | 10-nonadecenoate (19:1n9)                      | 7  | 0.47 (0.21-1.07) | 0.073    |
| met-a-627 | Epiandrosterone sulfate                        | 12 | 0.72 (0.60-0.87) | 7.67E-04 |
| met-a-628 | Linolenate [alpha or gamma; (18:3n3 or 6)]     | 5  | 1.07 (0.44-2.59) | 0.886    |
| met-a-629 | X-12510--2-aminooctanoic acid                  | 15 | 1.03 (0.77-1.38) | 0.839    |
| met-a-630 | X-12524                                        | 28 | 0.95 (0.34-2.65) | 0.924    |
| met-a-631 | Bilirubin (E,Z or Z,E)*                        | 17 | 1.06 (0.81-1.40) | 0.679    |
| met-a-632 | X-12544                                        | 18 | 1.02 (0.74-1.41) | 0.885    |
| met-a-633 | X-12556                                        | 21 | 0.90 (0.50-1.65) | 0.743    |
| met-a-634 | 1-arachidonoylglycerophosphoinositol*          | 17 | 0.63 (0.31-1.29) | 0.209    |
| met-a-635 | X-12627                                        | 11 | 0.78 (0.46-1.30) | 0.336    |

|           |                                         |    |                   |       |
|-----------|-----------------------------------------|----|-------------------|-------|
| met-a-636 | X-12644                                 | 21 | 0.79 (0.45-1.38)  | 0.404 |
| met-a-637 | X-12645                                 | 19 | 0.98 (0.67-1.45)  | 0.932 |
| met-a-638 | Asparagine                              | 39 | 0.64 (0.33-1.24)  | 0.183 |
| met-a-639 | X-12680                                 | 13 | 1.08 (0.67-1.74)  | 0.745 |
| met-a-640 | X-12696                                 | 22 | 2.12 (0.90-4.99)  | 0.084 |
| met-a-641 | X-12704                                 | 12 | 1.03 (0.77-1.38)  | 0.833 |
| met-a-642 | X-12712                                 | 39 | 0.99 (0.93-1.06)  | 0.806 |
| met-a-643 | X-12717                                 | 9  | 1.42 (1.12-1.79)  | 0.004 |
| met-a-644 | X-12719                                 | 12 | 0.91 (0.72-1.15)  | 0.422 |
| met-a-645 | X-12726                                 | 22 | 1.00 (0.78-1.28)  | 0.996 |
| met-a-646 | X-12728                                 | 39 | 0.99 (0.96-1.02)  | 0.457 |
| met-a-647 | X-12729                                 | 18 | 1.12 (0.97-1.31)  | 0.129 |
| met-a-648 | X-12734                                 | 11 | 1.03 (0.85-1.24)  | 0.771 |
| met-a-649 | X-12740                                 | 13 | 0.90 (0.74-1.08)  | 0.248 |
| met-a-650 | X-12749                                 | 42 | 0.83 (0.38-1.84)  | 0.647 |
| met-a-651 | Stachydrine                             | 6  | 0.90 (0.66-1.21)  | 0.477 |
| met-a-652 | Isovalerylcarnitine                     | 19 | 0.93 (0.61-1.43)  | 0.752 |
| met-a-653 | Stearoylcarnitine                       | 6  | 2.05 (0.76-5.50)  | 0.154 |
| met-a-654 | 1-stearoylglycerophosphoethanolamine    | 10 | 0.82 (0.33-2.04)  | 0.671 |
| met-a-655 | 1-linoleoylglycerophosphocholine        | 15 | 1.26 (0.56-2.84)  | 0.574 |
| met-a-656 | Bradykinin, des-arg(9)                  | 20 | 0.89 (0.78-1.01)  | 0.065 |
| met-a-657 | X-12771                                 | 15 | 1.25 (0.84-1.84)  | 0.268 |
| met-a-658 | X-12776                                 | 3  | 3.10 (0.11-88.76) | 0.509 |
| met-a-659 | Gamma-glutamylisoleucine*               | 24 | 1.04 (0.59-1.84)  | 0.894 |
| met-a-660 | X-12786                                 | 12 | 0.79 (0.50-1.23)  | 0.297 |
| met-a-661 | X-12798                                 | 9  | 0.93 (0.71-1.22)  | 0.591 |
| met-a-662 | X-12816                                 | 7  | 1.11 (0.81-1.54)  | 0.518 |
| met-a-663 | X-12830                                 | 13 | 1.06 (0.77-1.47)  | 0.708 |
| met-a-664 | X-12833                                 | 20 | 1.02 (0.94-1.09)  | 0.686 |
| met-a-665 | X-12844                                 | 14 | 0.89 (0.49-1.63)  | 0.709 |
| met-a-666 | X-12847                                 | 10 | 1.16 (0.90-1.51)  | 0.254 |
| met-a-667 | X-12850                                 | 16 | 0.90 (0.66-1.24)  | 0.523 |
| met-a-668 | Laurylcarnitine                         | 13 | 1.17 (0.73-1.86)  | 0.519 |
| met-a-669 | X-12851                                 | 8  | 1.04 (0.93-1.15)  | 0.508 |
| met-a-670 | X-12855                                 | 18 | 1.10 (0.70-1.72)  | 0.686 |
| met-a-671 | X-12990--docosapentaenoic acid (n6-DPA) | 13 | 1.44 (0.96-2.16)  | 0.078 |
| met-a-672 | Isovalerate                             | 4  | 0.92 (0.26-3.31)  | 0.899 |
| met-a-673 | X-13069                                 | 17 | 0.72 (0.46-1.14)  | 0.167 |
| met-a-674 | X-13183--stearamide                     | 11 | 0.91 (0.63-1.31)  | 0.609 |
| met-a-675 | X-13215                                 | 42 | 1.26 (0.71-2.26)  | 0.428 |
| met-a-676 | 7-methylguanaine                        | 11 | 1.10 (0.57-2.11)  | 0.776 |
| met-a-677 | Phenylacetylglutamine                   | 18 | 0.69 (0.49-0.98)  | 0.040 |

|           |                                           |    |                  |       |
|-----------|-------------------------------------------|----|------------------|-------|
| met-a-678 | Pro-hydroxy-pro                           | 19 | 0.47 (0.18-1.19) | 0.112 |
| met-a-679 | N2,N2-dimethylguanosine                   | 53 | 1.02 (0.61-1.71) | 0.935 |
| met-a-680 | Cysteine-glutathione disulfide            | 8  | 0.67 (0.45-0.99) | 0.045 |
| met-a-681 | Oleoylcarnitine                           | 12 | 0.66 (0.34-1.27) | 0.213 |
| met-a-682 | 1-arachidonoylglycerophosphoethanolamine* | 21 | 1.12 (0.65-1.93) | 0.693 |
| met-a-683 | X-13429                                   | 7  | 0.90 (0.71-1.13) | 0.364 |
| met-a-684 | X-13431--nonanoylcarnitine*               | 13 | 1.15 (0.88-1.51) | 0.301 |
| met-a-685 | X-13435                                   | 21 | 0.89 (0.54-1.45) | 0.631 |
| met-a-686 | X-13477                                   | 8  | 1.26 (0.47-3.34) | 0.649 |
| met-a-687 | 2-palmitoylglycerophosphocholine*         | 20 | 1.07 (0.45-2.53) | 0.883 |
| met-a-688 | 2-oleoylglycerophosphocholine*            | 18 | 1.69 (0.76-3.74) | 0.196 |
| met-a-689 | 2-stearoylglycerophosphocholine*          | 12 | 0.70 (0.39-1.27) | 0.238 |
| met-a-690 | 2-linoleoylglycerophosphocholine*         | 19 | 0.60 (0.30-1.21) | 0.153 |
| met-a-691 | X-13496                                   | 38 | 0.81 (0.38-1.74) | 0.589 |
| met-a-692 | 1-palmitoylglycerophosphoinositol*        | 10 | 1.07 (0.46-2.47) | 0.880 |
| met-a-693 | X-13548                                   | 44 | 1.32 (0.64-2.70) | 0.453 |
| met-a-694 | X-13549                                   | 17 | 1.02 (0.30-3.48) | 0.974 |
| met-a-695 | X-13553                                   | 8  | 1.27 (0.64-2.55) | 0.494 |
| met-a-696 | X-13619                                   | 31 | 1.54 (0.61-3.91) | 0.361 |
| met-a-697 | 2-methylbutyrylcarnitine                  | 22 | 0.87 (0.42-1.80) | 0.704 |
| met-a-698 | Hydroxyisovaleroyl carnitine              | 8  | 0.48 (0.12-1.89) | 0.294 |
| met-a-699 | Glutaroyl carnitine                       | 29 | 0.87 (0.57-1.34) | 0.532 |
| met-a-700 | X-13658                                   | 18 | 0.98 (0.91-1.04) | 0.474 |
| met-a-701 | X-13671                                   | 15 | 0.57 (0.25-1.29) | 0.179 |
| met-a-702 | 2-tetradecenoyl carnitine                 | 18 | 1.20 (0.81-1.78) | 0.355 |
| met-a-703 | 4-hydroxyhippurate                        | 8  | 1.02 (0.66-1.59) | 0.920 |
| met-a-704 | X-13741                                   | 12 | 0.96 (0.68-1.34) | 0.791 |
| met-a-705 | 1-myristoylglycerophosphocholine          | 6  | 0.70 (0.20-2.42) | 0.575 |
| met-a-706 | 1-oleoylglycerophosphoethanolamine        | 9  | 0.71 (0.20-2.55) | 0.601 |
| met-a-707 | 1-palmitoylglycerophosphoethanolamine     | 25 | 0.67 (0.39-1.15) | 0.148 |
| met-a-708 | 3-(3-hydroxyphenyl)propionate             | 10 | 1.08 (0.87-1.35) | 0.489 |
| met-a-709 | Tetradecanedioate                         | 20 | 0.87 (0.69-1.11) | 0.273 |
| met-a-710 | 2-hydroxypalmitate                        | 45 | 1.18 (0.63-2.20) | 0.613 |
| met-a-711 | Hexadecanedioate                          | 24 | 0.86 (0.64-1.14) | 0.288 |
| met-a-712 | Dihomo-linolenate (20:3n3 or n6)          | 22 | 0.93 (0.50-1.71) | 0.809 |
| met-a-713 | X-13859                                   | 39 | 0.92 (0.53-1.57) | 0.748 |
| met-a-714 | Threitol                                  | 13 | 0.92 (0.52-1.62) | 0.764 |
| met-a-715 | X-14056                                   | 8  | 0.51 (0.24-1.08) | 0.079 |
| met-a-716 | X-14057                                   | 16 | 1.13 (0.72-1.77) | 0.595 |
| met-a-717 | X-14086                                   | 13 | 0.75 (0.51-1.12) | 0.158 |
| met-a-718 | P-cresol sulfate                          | 15 | 0.87 (0.63-1.19) | 0.382 |
| met-a-719 | X-14189--leucylalanine                    | 11 | 1.12 (0.89-1.40) | 0.351 |
| met-a-720 | X-14205--alpha-glutamyltyrosine           | 15 | 1.04 (0.73-1.48) | 0.811 |

|           |                                                    |    |                  |       |
|-----------|----------------------------------------------------|----|------------------|-------|
| met-a-721 | X-14208--phenylalanylserine                        | 13 | 1.25 (0.95-1.64) | 0.105 |
| met-a-722 | X-14304--leucylalanine                             | 18 | 1.39 (1.05-1.85) | 0.021 |
| met-a-723 | X-14374                                            | 8  | 0.98 (0.47-2.05) | 0.955 |
| met-a-724 | X-14450--phenylalanylleucine                       | 5  | 1.45 (0.88-2.40) | 0.145 |
| met-a-725 | X-14473                                            | 11 | 1.20 (0.78-1.87) | 0.404 |
| met-a-726 | X-14541                                            | 15 | 0.77 (0.57-1.04) | 0.091 |
| met-a-727 | X-14588                                            | 9  | 0.09 (0.01-1.40) | 0.086 |
| met-a-728 | X-14625                                            | 16 | 0.66 (0.25-1.79) | 0.417 |
| met-a-729 | X-14626                                            | 17 | 0.95 (0.61-1.47) | 0.813 |
| met-a-730 | X-14632                                            | 18 | 0.89 (0.68-1.17) | 0.418 |
| met-a-731 | X-14658                                            | 11 | 0.86 (0.41-1.78) | 0.680 |
| met-a-732 | X-14662                                            | 19 | 0.91 (0.75-1.11) | 0.363 |
| met-a-733 | X-14745                                            | 13 | 1.75 (0.72-4.25) | 0.214 |
| met-a-734 | Gamma-glutamylglutamate                            | 10 | 1.35 (0.94-1.94) | 0.099 |
| met-a-735 | Octadecanedioate                                   | 9  | 1.44 (0.81-2.57) | 0.218 |
| met-a-736 | Leucylleucine                                      | 10 | 1.23 (0.71-2.12) | 0.463 |
| met-a-737 | 7-alpha-hydroxy-3-oxo-4-cholestenoate (7-Hoca)     | 15 | 0.47 (0.17-1.31) | 0.151 |
| met-a-738 | N-Butyl Oleate                                     | 10 | 0.72 (0.31-1.67) | 0.441 |
| met-a-739 | Dimethylarginine (SDMA + ADMA)                     | 33 | 1.57 (0.63-3.89) | 0.330 |
| met-a-740 | Taurolithocholate 3-sulfate                        | 10 | 1.00 (0.72-1.39) | 0.999 |
| met-a-741 | X-14977--vanillin                                  | 10 | 1.32 (0.73-2.40) | 0.361 |
| met-a-742 | Succinylcarnitine                                  | 40 | 1.13 (0.66-1.94) | 0.644 |
| met-a-743 | Tryptophan betaine                                 | 10 | 1.04 (0.86-1.26) | 0.691 |
| met-a-744 | Cyclo(leu-pro)                                     | 17 | 0.93 (0.70-1.25) | 0.647 |
| met-a-745 | Chiro-inositol                                     | 14 | 0.98 (0.86-1.12) | 0.821 |
| met-a-746 | 5alpha-androstan-3beta,17beta-diol disulfate       | 16 | 0.98 (0.79-1.23) | 0.892 |
| met-a-747 | 4-androsten-3beta,17beta-diol disulfate 1*         | 19 | 0.93 (0.76-1.15) | 0.525 |
| met-a-748 | 4-androsten-3beta,17beta-diol disulfate 2*         | 17 | 1.07 (0.71-1.61) | 0.745 |
| met-a-749 | 2-hydroxyglutarate                                 | 13 | 0.74 (0.39-1.41) | 0.363 |
| met-a-750 | Ergothioneine                                      | 3  | 1.47 (0.93-2.34) | 0.103 |
| met-a-751 | Palmitoyl sphingomyelin                            | 42 | 0.80 (0.40-1.63) | 0.542 |
| met-a-752 | Phenylalanylphenylalanine                          | 4  | 0.85 (0.39-1.86) | 0.685 |
| met-a-753 | Cis-4-decenoyl carnitine                           | 9  | 0.83 (0.52-1.34) | 0.450 |
| met-a-754 | 15-methylpalmitate (isobar with 2-methylpalmitate) | 14 | 0.59 (0.26-1.30) | 0.191 |

Abbreviations: SNP, single-nucleotide polymorphism; IVW, inverse-variance weighted; OR, odds ratio; 95% CI, 95% confidence interval.

**Table S6. Sensitivity analysis for the association of significant dietary habits with the risk of Parkinson's disease via the Maximum likelihood, MR-RAPS, Penalized IVW, and MR-Egger approaches.**

| ID          | Exposure                 | Maximum likelihood     |          | MR-RAPS                |          | Penalized IVW          |         | MR-Egger               |         | MR-Egger Intercept     |         | MR-PRESSO OR (95% CI) |         | Outlier_n |
|-------------|--------------------------|------------------------|----------|------------------------|----------|------------------------|---------|------------------------|---------|------------------------|---------|-----------------------|---------|-----------|
|             |                          | OR (95% CI)            | P value  | OR (95% CI)            | P value  | OR (95% CI)            | P value | OR (95% CI)            | P value | OR (95% CI)            | P value | OR (95% CI)           | P value |           |
| ukb-b-5779  | Alcohol intake frequency | 0.769<br>(0.675-0.876) | 7.67E-05 | 0.769<br>(0.678-0.874) | 5.21E-05 | 0.799<br>(0.689-0.925) | 0.003   | 1.045<br>(0.711-1.536) | 0.825   | 0.993<br>(0.985-1.001) | 0.098   | 0.78<br>(0.66–0.93)   | 0.005   | 0         |
| ukb-b-15926 | Cereal intake            | 1.479<br>(1.090-2.006) | 0.012    | 1.506<br>(1.122-2.023) | 0.006    | 1.542<br>(1.118-2.127) | 0.008   | 1.137<br>(0.335-3.861) | 0.836   | 1.003<br>(0.989-1.017) | 0.663   | 1.48<br>(1.06–2.06)   | 0.023   | 0         |
| ukb-b-16576 | Dried fruit intake       | 1.740<br>(1.251-2.421) | 0.001    | 1.753<br>(1.270-2.421) | 6.45E-04 | 1.645<br>(1.175-2.302) | 0.004   | 1.324<br>(0.282-6.204) | 0.722   | 1.003<br>(0.987-1.019) | 0.748   | 1.69<br>(1.13–2.53)   | 0.012   | 0         |

Abbreviations: MR-RAPS, mendelian randomization robust adjusted profile score; Penalized IVW, Penalized inverse-variance weighted; OR, odds ratio; 95% CI, 95% confidence interval.

**Table S7. Sensitivity analysis for the association of significant human blood metabolites with the risk of Parkinson's disease via the Maximum likelihood, MR-RAPS, Penalized IVW, and MR-Egger approaches.**

| ID        | Exposure                       | Maximum likelihood     |          | MR-RAPS                |          | Penalized IVW          |         | MR-Egger                 |          | MR-Egger Intercept     |         | MR-PRESSO method |         |           |
|-----------|--------------------------------|------------------------|----------|------------------------|----------|------------------------|---------|--------------------------|----------|------------------------|---------|------------------|---------|-----------|
|           |                                | OR (95% CI)            | P value  | OR (95% CI)            | P value  | OR (95% CI)            | P value | OR (95% CI)              | P value  | OR (95% CI)            | P value | OR (95% CI)      | P value | Outlier_n |
| met-a-314 | Mannose                        | 2.789<br>(1.585-4.905) | 3.72E-04 | 2.799<br>(1.601-4.894) | 3.04E-04 | 2.663<br>(1.281-5.533) | 0.009   | 10.891<br>(2.950-40.214) | 3.40E-04 | 0.962<br>(0.932-0.993) | 0.015   | 1.42 (1.10-1.82) | 0.041   | 0         |
| met-a-312 | Arabinose                      | 1.460<br>(1.018-2.094) | 0.040    | 1.460<br>(1.022-2.085) | 0.037    | 1.829<br>(1.085-3.085) | 0.024   | 1.079<br>(0.633-1.839)   | 0.780    | 1.026<br>(0.984-1.069) | 0.226   | 2.66 (1.28-5.53) | 0.018   | 0         |
| met-a-322 | Inosine                        | 0.783<br>(0.663-0.925) | 0.004    | 0.779<br>(0.658-0.923) | 0.004    | 0.791<br>(0.678-0.923) | 0.003   | 0.847<br>(0.677-1.060)   | 0.147    | 0.988<br>(0.961-1.016) | 0.399   | 0.79 (0.68-0.92) | 0.015   | 0         |
| met-a-348 | Ascorbate (Vitamin C)          | 0.845<br>(0.726-0.984) | 0.030    | 0.842<br>(0.719-0.986) | 0.032    | 0.847<br>(0.735-0.976) | 0.022   | 0.793<br>(0.617-1.021)   | 0.072    | 1.008<br>(0.983-1.033) | 0.538   | 0.85 (0.74-0.97) | 0.037   | 0         |
| met-a-358 | Serotonin (5HT)                | 0.549<br>(0.302-0.995) | 0.048    | 0.524<br>(0.283-0.969) | 0.039    | 0.537<br>(0.295-0.979) | 0.042   | 0.668<br>(0.178-2.508)   | 0.550    | 0.995<br>(0.966-1.024) | 0.714   | 0.54 (0.29-0.98) | 0.062   | 0         |
| met-a-360 | Gamma-glutamyltyrosine         | 2.174<br>(1.103-4.285) | 0.025    | 2.281<br>(1.152-4.519) | 0.018    | 2.028<br>(1.055-3.901) | 0.034   | 0.986<br>(0.119-8.170)   | 0.989    | 1.009<br>(0.987-1.030) | 0.435   | 2.20 (1.16-4.15) | 0.019   | 0         |
| met-a-385 | 3-phenylpropionate (hydrocinn) | 1.804<br>(1.134-2.867) | 0.013    | 1.703<br>(1.070-2.712) | 0.025    | 1.671<br>(1.034-2.700) | 0.036   | 2.352<br>(0.948-5.839)   | 0.065    | 0.986<br>(0.957-1.017) | 0.384   | 1.67 (1.03-2.70) | 0.056   | 0         |

|           |                                                      |                        |       |                        |       |                        |       |                         |       |                        |       |                  |       |   |
|-----------|------------------------------------------------------|------------------------|-------|------------------------|-------|------------------------|-------|-------------------------|-------|------------------------|-------|------------------|-------|---|
|           | amate)                                               |                        |       |                        |       |                        |       |                         |       |                        |       |                  |       |   |
| met-a-410 | 1-stearoyl glycerophosphoinositol                    | 0.512<br>(0.291-0.902) | 0.020 | 0.512<br>(0.287-0.913) | 0.023 | 0.527<br>(0.308-0.903) | 0.020 | 0.432<br>(0.174-1.072)  | 0.070 | 1.012<br>(0.969-1.056) | 0.594 | 0.53 (0.32-0.87) | 0.045 | 0 |
| met-a-425 | 1-stearoyl glycerol (1-monostearin)                  | 2.259<br>(1.258-4.056) | 0.006 | 2.339<br>(1.299-4.212) | 0.005 | 1.987<br>(1.066-3.704) | 0.031 | 2.833<br>(0.461-17.419) | 0.261 | 0.996<br>(0.967-1.026) | 0.790 | 2.25 (1.15-4.43) | 0.027 | 0 |
| met-a-437 | X-09108                                              | 0.340<br>(0.119-0.969) | 0.043 | 0.340<br>(0.115-1.006) | 0.051 | 0.353<br>(0.126-0.991) | 0.048 | 0.521<br>(0.040-6.741)  | 0.618 | 0.994<br>(0.958-1.031) | 0.743 | 0.35 (0.13-0.99) | 0.071 | 0 |
| met-a-461 | 3-carboxy-4-methyl-5-propyl-2-furanpropanoate (CMPF) | 0.751<br>(0.592-0.951) | 0.017 | 0.740<br>(0.582-0.941) | 0.014 | 0.743<br>(0.594-0.929) | 0.009 | 0.974<br>(0.535-1.772)  | 0.931 | 0.983<br>(0.949-1.018) | 0.340 | 0.74 (0.64-0.87) | 0.002 | 0 |
| met-a-464 | Serine                                               | 2.225<br>(1.074-4.611) | 0.031 | 2.280<br>(1.088-4.774) | 0.029 | 2.221<br>(1.093-4.515) | 0.027 | 4.274<br>(0.618-29.576) | 0.141 | 0.992<br>(0.970-1.014) | 0.476 | 2.22 (1.13-4.37) | 0.028 | 0 |
| met-a-507 | X-01911                                              | 1.543<br>(1.147-2.076) | 0.004 | 1.544<br>(1.135-2.100) | 0.006 | 1.525<br>(1.143-2.034) | 0.004 | 1.056<br>(0.417-2.680)  | 0.908 | 1.015<br>(0.979-1.053) | 0.416 | 1.52 (1.19-1.95) | 0.004 | 0 |
| met-a-548 | X-11820                                              | 1.926<br>(1.290-       | 0.001 | 1.887<br>(1.265-       | 0.002 | 1.837<br>(1.210-       | 0.004 | 1.462<br>(0.611-        | 0.393 | 1.008<br>(0.981-       | 0.556 | 1.84 (1.21-2.79) | 0.014 | 0 |

|           |                                |                        |          |                        |          |                        |          |                         |       |                        |       |                  |       |   |
|-----------|--------------------------------|------------------------|----------|------------------------|----------|------------------------|----------|-------------------------|-------|------------------------|-------|------------------|-------|---|
|           |                                | 2.875)                 |          | 2.815)                 |          | 2.789)                 |          | 3.496)                  |       | 1.037)                 |       |                  |       |   |
| met-a-551 | X-11847                        | 1.422<br>(1.120-1.806) | 0.004    | 1.420<br>(1.104-1.825) | 0.006    | 1.410<br>(1.116-1.782) | 0.004    | 1.670<br>(0.942-2.963)  | 0.079 | 0.988<br>(0.951-1.026) | 0.525 | 1.41 (1.16-1.72) | 0.006 | 0 |
| met-a-565 | X-12029                        | 0.397<br>(0.194-0.811) | 0.011    | 0.364<br>(0.183-0.727) | 0.004    | 0.349<br>(0.179-0.680) | 0.002    | 0.783<br>(0.205-2.984)  | 0.720 | 0.989<br>(0.971-1.007) | 0.231 | 0.40 (0.18-0.87) | 0.027 | 0 |
| met-a-608 | X-12435                        | 1.084<br>(1.007-1.167) | 0.032    | 1.085<br>(1.005-1.172) | 0.037    | 1.083<br>(1.007-1.164) | 0.031    | 1.024<br>(0.909-1.154)  | 0.695 | 1.017<br>(0.989-1.045) | 0.249 | 1.08 (1.02-1.15) | 0.018 | 0 |
| met-a-612 | X-12450                        | 0.534<br>(0.329-0.865) | 0.011    | 0.577<br>(0.357-0.931) | 0.024    | 0.595<br>(0.356-0.994) | 0.048    | 0.699<br>(0.292-1.673)  | 0.421 | 0.996<br>(0.979-1.013) | 0.651 | 0.59 (0.36-0.99) | 0.057 | 0 |
| met-a-627 | Epiandrosterone sulfate        | 0.723<br>(0.598-0.874) | 8.19E-04 | 0.723<br>(0.597-0.876) | 9.39E-04 | 0.725<br>(0.601-0.874) | 7.67E-04 | 0.731<br>(0.540-0.989)  | 0.042 | 0.999<br>(0.977-1.022) | 0.944 | 0.72 (0.63-0.84) | 0.001 | 0 |
| met-a-643 | X-12717                        | 1.431<br>(1.120-1.829) | 0.004    | 1.432<br>(1.110-1.848) | 0.006    | 1.416<br>(1.117-1.795) | 0.004    | 1.393<br>(0.479-4.049)  | 0.542 | 1.001<br>(0.923-1.086) | 0.976 | 1.42 (1.13-1.77) | 0.017 | 0 |
| met-a-677 | Phenylacetamide                | 0.700<br>(0.487-1.004) | 0.053    | 0.682<br>(0.470-0.989) | 0.043    | 0.784<br>(0.548-1.122) | 0.184    | 0.714<br>(0.326-1.562)  | 0.399 | 0.999<br>(0.973-1.026) | 0.929 | 0.69 (0.47-1.02) | 0.083 | 0 |
| met-a-680 | Cysteine-glutathione disulfide | 0.657<br>(0.437-0.987) | 0.043    | 0.653<br>(0.436-0.978) | 0.039    | 0.671<br>(0.392-1.148) | 0.145    | 4.382<br>(0.460-41.744) | 0.199 | 0.929<br>(0.853-1.013) | 0.095 | 0.67 (0.39-1.15) | 0.189 | 0 |
| met-a-722 | X-14304--leucylalanine         | 1.410<br>(1.058-1.879) | 0.019    | 1.402<br>(1.039-1.893) | 0.027    | 1.394<br>(1.051-1.850) | 0.021    | 1.193<br>(0.502-2.832)  | 0.690 | 1.007<br>(0.971-1.044) | 0.708 | 1.39 (1.14-1.70) | 0.005 | 0 |

Abbreviations: MR-RAPS, mendelian randomization robust adjusted profile score; Penalized IVW, Penalized inverse-variance weighted; OR,

odds ratio; 95% CI, 95% confidence interval.

**Table S8. The associations of processed alcohol intake frequency as exposure and 19 human blood metabolites as outcome using the inverse-variance weighted method.**

| ID        | Outcome                                              | nSNP | IVW              |          |
|-----------|------------------------------------------------------|------|------------------|----------|
|           |                                                      |      | OR (95% CI)      | P value  |
| met-a-312 | Arabinose                                            | 216  | 1.02 (0.99-1.05) | 0.150    |
| met-a-322 | Inosine                                              | 215  | 0.96 (0.88-1.05) | 0.396    |
| met-a-348 | Ascorbate (Vitamin C)                                | 214  | 1.05 (0.97-1.15) | 0.235    |
| met-a-358 | Serotonin (5HT)                                      | 216  | 1.01 (0.98-1.04) | 0.366    |
| met-a-360 | Gamma-glutamyltyrosine                               | 216  | 1.00 (0.99-1.02) | 0.883    |
| met-a-385 | 3-phenylpropionate (hydrocinnamate)                  | 216  | 0.97 (0.93-1.00) | 0.084    |
| met-a-410 | 1-stearoylglycerophosphoinositol                     | 216  | 0.98 (0.96-1.01) | 0.261    |
| met-a-425 | 1-stearoylglycerol (1-monostearin)                   | 216  | 0.99 (0.97-1.01) | 0.520    |
| met-a-461 | 3-carboxy-4-methyl-5-propyl-2-furanpropanoate (CMPF) | 216  | 0.91 (0.86-0.97) | 0.004    |
| met-a-464 | Serine                                               | 216  | 1.00 (0.98-1.01) | 0.647    |
| met-a-507 | X-01911                                              | 216  | 0.92 (0.87-0.96) | 8.04E-04 |
| met-a-548 | X-11820                                              | 216  | 1.01 (0.98-1.04) | 0.608    |
| met-a-551 | X-11847                                              | 216  | 0.97 (0.89-1.05) | 0.417    |
| met-a-565 | X-12029                                              | 216  | 1.01 (1.00-1.02) | 0.166    |
| met-a-608 | X-12435                                              | 215  | 0.92 (0.79-1.08) | 0.319    |
| met-a-612 | X-12450                                              | 216  | 1.01 (0.98-1.04) | 0.478    |
| met-a-627 | Epiandrosterone sulfate                              | 216  | 0.93 (0.89-0.98) | 0.003    |
| met-a-643 | X-12717                                              | 216  | 1.03 (0.94-1.13) | 0.467    |
| met-a-722 | X-14304--leucylalanine                               | 216  | 0.99 (0.94-1.05) | 0.802    |

Abbreviations: SNP, single-nucleotide polymorphism; IVW, inverse-variance weighted; OR, odds ratio; 95% CI, 95% confidence interval.

**Table S9. The associations of processed dried fruit intake as exposure and 19 human blood metabolites as outcome using the inverse-variance weighted method.**

| ID        | Outcome                                              | nSNP | IVW              |                |
|-----------|------------------------------------------------------|------|------------------|----------------|
|           |                                                      |      | OR (95% CI)      | <i>P</i> value |
| met-a-312 | Arabinose                                            | 147  | 0.94 (0.88-1.00) | 0.064          |
| met-a-322 | Inosine                                              | 145  | 1.00 (0.82-1.22) | 0.991          |
| met-a-348 | Ascorbate (Vitamin C)                                | 145  | 1.05 (0.85-1.28) | 0.659          |
| met-a-358 | Serotonin (5HT)                                      | 147  | 0.97 (0.90-1.03) | 0.308          |
| met-a-360 | Gamma-glutamyltyrosine                               | 147  | 1.00 (0.96-1.04) | 0.995          |
| met-a-385 | 3-phenylpropionate (hydrocinnamate)                  | 147  | 1.11 (1.02-1.21) | 0.017          |
| met-a-410 | 1-stearoylglycerophosphoinositol                     | 147  | 1.02 (0.96-1.09) | 0.528          |
| met-a-425 | 1-stearoylglycerol (1-monostearin)                   | 147  | 1.00 (0.95-1.06) | 0.854          |
| met-a-461 | 3-carboxy-4-methyl-5-propyl-2-furanpropanoate (CMPF) | 147  | 1.28 (1.10-1.48) | 0.001          |
| met-a-464 | Serine                                               | 147  | 0.99 (0.95-1.03) | 0.698          |
| met-a-507 | X-01911                                              | 147  | 1.04 (0.92-1.17) | 0.564          |
| met-a-548 | X-11820                                              | 147  | 1.12 (1.04-1.20) | 0.004          |
| met-a-551 | X-11847                                              | 147  | 1.12 (0.93-1.35) | 0.241          |
| met-a-565 | X-12029                                              | 147  | 0.98 (0.95-1.01) | 0.129          |
| met-a-608 | X-12435                                              | 146  | 0.93 (0.64-1.36) | 0.714          |
| met-a-612 | X-12450                                              | 147  | 0.97 (0.91-1.03) | 0.359          |
| met-a-627 | Epiandrosterone sulfate                              | 147  | 1.14 (1.02-1.28) | 0.018          |
| met-a-643 | X-12717                                              | 146  | 1.26 (1.02-1.56) | 0.033          |
| met-a-722 | X-14304--leucylalanine                               | 146  | 1.05 (0.93-1.19) | 0.410          |

Abbreviations: SNP, single-nucleotide polymorphism; IVW, inverse-variance weighted; OR, odds ratio; 95% CI, 95% confidence interval.

**Table S10. The associations of processed cereal intake as exposure and 19 human blood metabolites as outcome using the inverse-variance weighted method.**

| ID        | Outcome                                              | nSNP | IVW              |                |
|-----------|------------------------------------------------------|------|------------------|----------------|
|           |                                                      |      | OR (95% CI)      | <i>P</i> value |
| met-a-312 | Arabinose                                            | 153  | 1.01 (0.95-1.07) | 0.749          |
| met-a-322 | Inosine                                              | 153  | 1.15 (0.96-1.37) | 0.137          |
| met-a-348 | Ascorbate (Vitamin C)                                | 153  | 1.08 (0.90-1.30) | 0.382          |
| met-a-358 | Serotonin (5HT)                                      | 153  | 1.02 (0.96-1.08) | 0.484          |
| met-a-360 | Gamma-glutamyltyrosine                               | 153  | 0.98 (0.95-1.01) | 0.182          |
| met-a-385 | 3-phenylpropionate (hydrocinnamate)                  | 153  | 1.08 (1.00-1.16) | 0.055          |
| met-a-410 | 1-stearoylglycerophosphoinositol                     | 153  | 1.03 (0.97-1.09) | 0.333          |
| met-a-425 | 1-stearoylglycerol (1-monostearin)                   | 153  | 0.99 (0.94-1.04) | 0.621          |
| met-a-461 | 3-carboxy-4-methyl-5-propyl-2-furanpropanoate (CMPF) | 153  | 0.93 (0.81-1.06) | 0.267          |
| met-a-464 | Serine                                               | 153  | 1.01 (0.97-1.04) | 0.701          |
| met-a-507 | X-01911                                              | 153  | 0.89 (0.80-0.99) | 0.033          |
| met-a-548 | X-11820                                              | 153  | 1.02 (0.96-1.09) | 0.512          |
| met-a-551 | X-11847                                              | 153  | 0.99 (0.84-1.17) | 0.918          |
| met-a-565 | X-12029                                              | 153  | 1.02 (1.00-1.05) | 0.104          |
| met-a-608 | X-12435                                              | 153  | 0.93 (0.66-1.29) | 0.650          |
| met-a-612 | X-12450                                              | 153  | 1.00 (0.95-1.06) | 0.918          |
| met-a-627 | Epiandrosterone sulfate                              | 153  | 1.11 (1.00-1.22) | 0.049          |
| met-a-643 | X-12717                                              | 153  | 0.95 (0.76-1.19) | 0.643          |
| met-a-722 | X-14304--leucylalanine                               | 153  | 0.96 (0.85-1.08) | 0.511          |

Abbreviations: SNP, single-nucleotide polymorphism; IVW, inverse-variance weighted; OR, odds ratio; 95% CI, 95% confidence interval.
